# Supplementary material for: Transcriptome Analysis of Leaf Senescence Regulation Under Alkaline Stress in Medicago truncatula
Source: Front Plant Sci. 2022 Apr 28;13:881456. doi: 10.3389/fpls.2022.881456 (PMC9096890; doi:10.3389/fpls.2022.881456)
Supplement: Supplementary Table 2 — Project sample information, raw data, quality control data and comparison data. [file Table_5.XLSX]

## Sheet: Project sample information
Species Latin Name	Sample Analysis Name	Group Name
Medicago_truncatula	A1	Control
Medicago_truncatula	A2
Medicago_truncatula	A3
Medicago_truncatula	B1	Dark-2D
Medicago_truncatula	B2
Medicago_truncatula	B3
Medicago_truncatula	I1	Dark-4D
Medicago_truncatula	I2
Medicago_truncatula	I3
Medicago_truncatula	P1	Dark-6D
Medicago_truncatula	P2
Medicago_truncatula	P3
Medicago_truncatula	E1	Control-light-2D
Medicago_truncatula	E2
Medicago_truncatula	E3
Medicago_truncatula	L1	Control-light-4D
Medicago_truncatula	L2
Medicago_truncatula	L3
Medicago_truncatula	S1	Control-light-6D
Medicago_truncatula	S2
Medicago_truncatula	S3
Medicago_truncatula	F1	10 mM NaHCO3-light-2D
Medicago_truncatula	F2
Medicago_truncatula	F3
Medicago_truncatula	M1	10 mM NaHCO3-light-4D
Medicago_truncatula	M2
Medicago_truncatula	M3
Medicago_truncatula	T1	10 mM NaHCO3-light-6D
Medicago_truncatula	T2
Medicago_truncatula	T3
Medicago_truncatula	G1	20 mM NaHCO3-light-2D
Medicago_truncatula	G2
Medicago_truncatula	G3
Medicago_truncatula	N1	20 mM NaHCO3-light-4D
Medicago_truncatula	N2
Medicago_truncatula	N3
Medicago_truncatula	Y1	20 mM NaHCO3-light-6D
Medicago_truncatula	Y2
Medicago_truncatula	Y3

## Sheet: Raw data statistics
Group Name	Sample	Raw reads	Raw bases	Error rate(%)	Q20(%)	Q30(%)	GC content(%)
Control	A1	42876956	6474420356	0.0281	96.55	91.62	42.83
	A2	48969012	7394320812	0.0274	96.85	92.14	42.96
	A3	46930138	7086450838	0.0274	96.87	92.15	43.01
Dark-2D	B1	43258436	6532023836	0.0271	96.98	92.38	42.85
	B2	45471784	6866239384	0.028	96.4	91.89	43.61
	B3	50194352	7579347152	0.026	97.53	93.27	42.11
Dark-4D	I1	43371202	6549051502	0.0247	98.03	94.53	42.22
	I2	44996092	6794409892	0.0246	98.05	94.68	42.45
	I3	50917052	7688474852	0.0246	98.07	94.73	42.49
Dark-6D	P1	51978318	7848726018	0.0251	97.76	94.37	42.68
	P2	69259576	10458195976	0.0243	98.25	94.93	42.45
	P3	64705094	9770469194	0.0252	97.66	94.28	43.52
Control-light-2D	E1	59597268	8999187468	0.0249	97.93	94.43	42.79
	E2	48795374	7368101474	0.0249	97.86	94.47	42.5
	E3	40994682	6190196982	0.0247	98.06	94.53	42.38
Control-light-4D	L1	46566728	7031575928	0.0249	97.88	94.51	43.08
	L2	50918998	7688768698	0.0243	98.24	94.94	42.73
	L3	54852786	8282770686	0.025	97.94	94.22	42.5
Control-light-6D	S1	57627816	8701800216	0.0245	98.14	94.75	42.47
	S2	54835822	8280209122	0.0242	98.24	95.13	42.69
	S3	55552816	8388475216	0.0246	98.04	94.66	42.5
10 mM NaHCO3-light-2D	F1	44734288	6754877488	0.0259	97.35	93.69	43.27
	F2	55790804	8424411404	0.0248	97.91	94.61	43.5
	F3	44150688	6666753888	0.025	97.85	94.33	43.1
10 mM NaHCO3-light-4D	M1	49016376	7401472776	0.025	97.84	94.32	42.78
	M2	55682064	8407991664	0.0245	98.09	94.79	42.84
	M3	46862318	7076210018	0.0252	97.63	94.26	43.89
10 mM NaHCO3-light-6D	T1	44163180	6668640180	0.0259	97.32	93.67	43.55
	T2	67487546	10190619446	0.0245	98.09	94.74	42.8
	T3	52079254	7863967354	0.0275	96.42	92.57	46.59
20 mM NaHCO3-light-2D	G1	55025274	8308816374	0.0249	97.7	94.63	46.28
	G2	58029136	8762399536	0.0254	97.6	94.08	43.77
	G3	61122774	9229538874	0.025	97.83	94.33	42.87
20 mM NaHCO3-light-4D	N1	51769632	7817214432	0.026	97.25	93.62	43.31
	N2	45289792	6838758592	0.0252	97.74	94.14	42.84
	N3	43924994	6632674094	0.0256	97.47	93.87	42.65
20 mM NaHCO3-light-6D	Y1	62745840	9474621840	0.0252	97.73	94.25	44.83
	Y2	43919622	6631862922	0.0257	97.31	93.94	44.51
	Y3	53267190	8043345690	0.026	97.12	93.81	51.65

## Sheet: Quality control data statistics
Group Name	Sample	Clean reads	Clean bases	Error rate(%)	Q20(%)	Q30(%)	GC content(%)
Control	A1	42223890	6091841185	0.0264	97.49	92.82	42.31
	A2	48196610	6921375069	0.0259	97.7	93.28	42.33
	A3	46167826	6634131855	0.0259	97.7	93.27	42.34
Dark-2D	B1	42829332	6257866439	0.0258	97.72	93.34	42.33
	B2	44603920	6349733209	0.0254	97.85	93.72	42.4
	B3	49883090	7365867685	0.0253	97.95	93.82	41.76
Dark-4D	I1	42848588	6203183253	0.0238	98.55	95.26	41.69
	I2	44441852	6444287317	0.0235	98.66	95.57	41.83
	I3	50351894	7306016578	0.0236	98.67	95.55	41.87
Dark-6D	P1	51316612	7385676204	0.0236	98.63	95.5	41.89
	P2	68614742	10114862709	0.0236	98.66	95.49	42.07
	P3	63872206	8845767527	0.0233	98.77	95.86	42.39
Control-light-2D	E1	58838702	8522856966	0.0237	98.6	95.36	42.22
	E2	48215202	6961714482	0.0237	98.61	95.42	41.95
	E3	40484886	5926592807	0.0239	98.55	95.2	42.01
Control-light-4D	L1	46035650	6508676525	0.0235	98.7	95.64	42.24
	L2	50465200	7357621924	0.0235	98.71	95.65	42.26
	L3	54250326	7945707229	0.0241	98.46	94.95	42.11
Control-light-6D	S1	57083510	8365594002	0.0237	98.63	95.44	42.1
	S2	54314664	7857547948	0.0232	98.78	95.89	42.16
	S3	54916468	7941591081	0.0236	98.65	95.54	41.92
10 mM NaHCO3-light-2D	F1	43806526	6301771923	0.0239	98.5	95.18	42.29
	F2	54986874	7864965493	0.0235	98.67	95.66	42.92
	F3	43430380	6219507608	0.0237	98.59	95.41	42.15
10 mM NaHCO3-light-4D	M1	48348840	7006800651	0.0238	98.58	95.35	42.16
	M2	55094408	8053737740	0.0236	98.66	95.54	42.39
	M3	45979924	6481839806	0.0233	98.72	95.82	42.73
10 mM NaHCO3-light-6D	T1	43226190	6111635897	0.0238	98.54	95.32	42.43
	T2	66839690	9688684725	0.0236	98.65	95.51	42.26
	T3	49085632	6764992643	0.0238	98.48	95.39	44.09
20 mM NaHCO3-light-2D	G1	53764078	7613474154	0.023	98.85	96.21	45.28
	G2	57082356	8016851544	0.0236	98.63	95.51	42.69
	G3	60295506	8644718596	0.0237	98.6	95.41	42.1
20 mM NaHCO3-light-4D	N1	50397206	7025618263	0.0237	98.56	95.41	42.02
	N2	44527814	6439544672	0.0238	98.53	95.26	42.14
	N3	43091608	6188418219	0.0239	98.51	95.26	41.99
20 mM NaHCO3-light-6D	Y1	61635438	8776730526	0.0235	98.66	95.64	44.04
	Y2	42421754	5920171526	0.0233	98.72	95.84	42.81
	Y3	50910754	7174765826	0.0231	98.8	96.13	50.39

## Sheet: Comparison result statistics
Group Name	Sample	Total reads	Total mapped	Multiple mapped	Uniquely mapped
Control	A1	42223890	36998940(87.63%)	2151742(5.1%)	34847198(82.53%)
	A2	48196610	42378980(87.93%)	2612292(5.42%)	39766688(82.51%)
	A3	46167826	40560848(87.86%)	2484912(5.38%)	38075936(82.47%)
Dark-2D	B1	42829332	37262843(87.0%)	1739033(4.06%)	35523810(82.94%)
	B2	44603920	38993700(87.42%)	2015800(4.52%)	36977900(82.9%)
	B3	49883090	43442028(87.09%)	1570512(3.15%)	41871516(83.94%)
Dark-4D	I1	42848588	37501951(87.52%)	1517150(3.54%)	35984801(83.98%)
	I2	44441852	39086185(87.95%)	1669737(3.76%)	37416448(84.19%)
	I3	50351894	44430035(88.24%)	1855104(3.68%)	42574931(84.55%)
Dark-6D	P1	51316612	44670667(87.05%)	2011268(3.92%)	42659399(83.13%)
	P2	68614742	59375435(86.53%)	2917989(4.25%)	56457446(82.28%)
	P3	63872206	55555888(86.98%)	3906836(6.12%)	51649052(80.86%)
Control-light-2D	E1	58838702	52162116(88.65%)	2541400(4.32%)	49620716(84.33%)
	E2	48215202	42378490(87.89%)	1854827(3.85%)	40523663(84.05%)
	E3	40484886	35606951(87.95%)	1793320(4.43%)	33813631(83.52%)
Control-light-4D	L1	46035650	40565796(88.12%)	2328984(5.06%)	38236812(83.06%)
	L2	50465200	44559389(88.3%)	2449116(4.85%)	42110273(83.44%)
	L3	54250326	47786515(88.09%)	2325177(4.29%)	45461338(83.8%)
Control-light-6D	S1	57083510	50035642(87.65%)	2414049(4.23%)	47621593(83.42%)
	S2	54314664	47413593(87.29%)	2492644(4.59%)	44920949(82.71%)
	S3	54916468	47997297(87.4%)	2546089(4.64%)	45451208(82.76%)
10 mM NaHCO3-light-2D	F1	43806526	38846107(88.68%)	2709348(6.18%)	36136759(82.49%)
	F2	54986874	48967601(89.05%)	5659276(10.29%)	43308325(78.76%)
	F3	43430380	38287529(88.16%)	2133853(4.91%)	36153676(83.25%)
10 mM NaHCO3-light-4D	M1	48348840	42680783(88.28%)	2325811(4.81%)	40354972(83.47%)
	M2	55094408	48849407(88.66%)	2492332(4.52%)	46357075(84.14%)
	M3	45979924	39090878(85.02%)	4148718(9.02%)	34942160(75.99%)
10 mM NaHCO3-light-6D	T1	43226190	36867143(85.29%)	2371377(5.49%)	34495766(79.8%)
	T2	66839690	57983450(86.75%)	3155986(4.72%)	54827464(82.03%)
	T3	49085632	37892717(77.2%)	3786249(7.71%)	34106468(69.48%)
20 mM NaHCO3-light-2D	G1	53764078	43969088(81.78%)	10253883(19.07%)	33715205(62.71%)
	G2	57082356	49942324(87.49%)	5431418(9.52%)	44510906(77.98%)
	G3	60295506	53197059(88.23%)	3261520(5.41%)	49935539(82.82%)
20 mM NaHCO3-light-4D	N1	50397206	43578576(86.47%)	2936756(5.83%)	40641820(80.64%)
	N2	44527814	38720420(86.96%)	1852225(4.16%)	36868195(82.8%)
	N3	43091608	37686811(87.46%)	1945307(4.51%)	35741504(82.94%)
20 mM NaHCO3-light-6D	Y1	61635438	46771864(75.88%)	4814915(7.81%)	41956949(68.07%)
	Y2	42421754	35943539(84.73%)	3729719(8.79%)	32213820(75.94%)
	Y3	50910754	15136758(29.73%)	3582269(7.04%)	11554489(22.7%)
