# Supplementary material for: Transcriptome Analysis of Leaf Senescence Regulation Under Alkaline Stress in Medicago truncatula
Source: Front Plant Sci. 2022 Apr 28;13:881456. doi: 10.3389/fpls.2022.881456 (PMC9096890; doi:10.3389/fpls.2022.881456)
Supplement: Supplementary Table 7 — 169 DEGs related to ion transport. [file Table_10.XLSX]

## Sheet: 169 DEGs
Gene ID	Gene Name	Gene Description	GO_id	GO_term	Go_description	KO_id	KO_name	Pathway_id	Pathway_definition	COG_id	COG_Functional Categories	NR_hit-name	NR_description	Swiss-Prot_hit-name	Swiss-Prot_description	Pfam_id	Domain	Domain description
MTR_7g010820		peptide/nitrate transporter	GO:0010167;;GO:0015706;;GO:0046686;;GO:0055085;;GO:0016021;;GO:0016020;;GO:0005886;;GO:0022857;;GO:0015112	biological_process;;biological_process;;biological_process;;biological_process;;cellular_component;;cellular_component;;cellular_component;;molecular_function;;molecular_function;;	BP:response to nitrate;;BP:nitrate transport;;BP:response to cadmium ion;;BP:transmembrane transport;;CC:integral component of membrane;;CC:membrane;;CC:plasma membrane;;MF:transmembrane transporter activity;;MF:nitrate transmembrane transporter activity;;	K14638	SLC15A3_4, PHT	------	------	COG3104	E:Amino acid transport and metabolism	XP_003621236.2	protein NRT1/ PTR FAMILY 7.3 [Medicago truncatula]	sp|Q9LQL2|PTR14_ARATH;;	Protein NRT1/ PTR FAMILY 7.3 OS=Arabidopsis thaliana OX=3702 GN=NPF7.3 PE=1 SV=2;;	PF00854.21	PTR2	POT family
MTR_3g112530		C4-dicarboxylate transporter/malic acid protein	GO:0006873;;GO:0055085;;GO:0016021;;GO:0016020;;GO:0005623;;GO:0008308	biological_process;;biological_process;;cellular_component;;cellular_component;;cellular_component;;molecular_function;;	BP:cellular ion homeostasis;;BP:transmembrane transport;;CC:integral component of membrane;;CC:membrane;;CC:cell;;MF:voltage-gated anion channel activity;;	------	------	------	------	ENOG410YDIV	P:Inorganic ion transport and metabolism	KEH36225.1	C4-dicarboxylate transporter/malic acid protein [Medicago truncatula]	sp|Q5E930|SLAH1_ARATH;;	S-type anion channel SLAH1 OS=Arabidopsis thaliana OX=3702 GN=SLAH1 PE=2 SV=1;;	PF03595.17	SLAC1	Voltage-dependent anion channel
MTR_2g101610		nitrate transporter 1	GO:0006857;;GO:0055085;;GO:0016021;;GO:0016020;;GO:0005886;;GO:0015333;;GO:0022857;;GO:1904680;;GO:0035673	biological_process;;biological_process;;cellular_component;;cellular_component;;cellular_component;;molecular_function;;molecular_function;;molecular_function;;molecular_function;;	BP:oligopeptide transport;;BP:transmembrane transport;;CC:integral component of membrane;;CC:membrane;;CC:plasma membrane;;MF:peptid;;MF:transmembrane transporter activity;;MF:peptide transmembrane transporter activity;;MF:oligopeptide transmembrane transporter activity;;	K14638	SLC15A3_4, PHT	------	------	COG3104	E:Amino acid transport and metabolism	XP_003597726.1	protein NRT1/ PTR FAMILY 1.2 [Medicago truncatula]	sp|Q9M817|PTR6_ARATH;;	Protein NRT1/ PTR FAMILY 1.2 OS=Arabidopsis thaliana OX=3702 GN=NPF1.2 PE=1 SV=1;;	PF00854.21;;PF07690.16	PTR2;;MFS_1	POT family;;Major Facilitator Superfamily
MTR_2g101560		peptide/nitrate transporter plant	GO:0006857;;GO:0055085;;GO:0016021;;GO:0016020;;GO:0005886;;GO:0015333;;GO:0022857;;GO:1904680;;GO:0035673	biological_process;;biological_process;;cellular_component;;cellular_component;;cellular_component;;molecular_function;;molecular_function;;molecular_function;;molecular_function;;	BP:oligopeptide transport;;BP:transmembrane transport;;CC:integral component of membrane;;CC:membrane;;CC:plasma membrane;;MF:peptid;;MF:transmembrane transporter activity;;MF:peptide transmembrane transporter activity;;MF:oligopeptide transmembrane transporter activity;;	K14638	SLC15A3_4, PHT	------	------	COG3104	E:Amino acid transport and metabolism	XP_024633177.1	protein NRT1/ PTR FAMILY 1.2 [Medicago truncatula]	sp|Q9M817|PTR6_ARATH;;	Protein NRT1/ PTR FAMILY 1.2 OS=Arabidopsis thaliana OX=3702 GN=NPF1.2 PE=1 SV=1;;	PF00854.21;;PF07690.16	PTR2;;MFS_1	POT family;;Major Facilitator Superfamily
MTR_5g014150		peptide transporter	GO:0010167;;GO:0055085;;GO:0016021;;GO:0016020;;GO:0005886;;GO:0022857;;GO:0015112	biological_process;;biological_process;;cellular_component;;cellular_component;;cellular_component;;molecular_function;;molecular_function;;	BP:response to nitrate;;BP:transmembrane transport;;CC:integral component of membrane;;CC:membrane;;CC:plasma membrane;;MF:transmembrane transporter activity;;MF:nitrate transmembrane transporter activity;;	K14638	SLC15A3_4, PHT	------	------	COG3104	E:Amino acid transport and metabolism	RHN53852.1	putative proton-dependent oligopeptide transporter family, major facilitator superfamily [Medicago truncatula]	sp|Q9LQL2|PTR14_ARATH;;	Protein NRT1/ PTR FAMILY 7.3 OS=Arabidopsis thaliana OX=3702 GN=NPF7.3 PE=1 SV=2;;	PF00854.21;;PF07690.16	PTR2;;MFS_1	POT family;;Major Facilitator Superfamily
MTR_2g048720		inositol transporter 4	GO:0008643;;GO:0055085;;GO:0016021;;GO:0016020;;GO:0005887;;GO:0005215;;GO:0022857;;GO:0005366	biological_process;;biological_process;;cellular_component;;cellular_component;;cellular_component;;molecular_function;;molecular_function;;molecular_function;;	BP:carbohydrate transport;;BP:transmembrane transport;;CC:integral component of membrane;;CC:membrane;;CC:integral component of plasma membrane;;MF:transporter activity;;MF:transmembrane transporter activity;;MF:myo-inosito;;	K08150	SLC2A13, ITR	------	------	ENOG410XNQK	S:Function unknown	XP_003595521.1	probable inositol transporter 2 [Medicago truncatula]	sp|Q9C757|INT2_ARATH;;	Probable inositol transporter 2 OS=Arabidopsis thaliana OX=3702 GN=INT2 PE=1 SV=1;;	PF00083.24;;PF07690.16;;PF06609.13	Sugar_tr;;MFS_1;;TRI12	Sugar;;Major Facilitator Superfamily;;Fungal trichothecene efflux pump
MTR_4g094010		white-brown-complex ABC transporter family protein, putative	GO:0055085;;GO:0016021;;GO:0016020;;GO:0005886;;GO:0016787;;GO:0042626;;GO:0099131;;GO:0000166;;GO:0008559;;GO:0016887;;GO:0005524	biological_process;;cellular_component;;cellular_component;;cellular_component;;molecular_function;;molecular_function;;deleted;;molecular_function;;molecular_function;;molecular_function;;molecular_function;;	BP:transmembrane transport;;CC:integral component of membrane;;CC:membrane;;CC:plasma membrane;;MF:hydrolase activity;;MF:ATPase activity, coupled to transmembrane movement of substances;;MF:old GO;;MF:nucleotide binding;;MF:xenobiotic-transporting ATPase activity;;MF:ATPase activity;;MF:ATP binding;;	------	------	------	------	COG1131	V:Defense mechanisms	XP_003608431.1	ABC transporter G family member 11 [Medicago truncatula]	sp|Q8RXN0|AB11G_ARATH;;	ABC transporter G family member 11 OS=Arabidopsis thaliana OX=3702 GN=ABCG11 PE=1 SV=1;;	PF01061.24;;PF00005.27;;PF13304.6;;PF03215.15;;PF02463.19;;PF13555.6;;PF03193.16;;PF13476.6	ABC2_membrane;;ABC_tran;;AAA_21;;Rad17;;SMC_N;;AAA_29;;RsgA_GTPase;;AAA_23	ABC-2 type transporter;;ABC transporter;;AAA domain, putative AbiEii toxin, Type IV TA system;;Rad17 P-loop domain;;RecF/RecN/SMC N terminal domain;;P-loop containing region of AAA domain;;RsgA GTPase;;AAA domain
MTR_6g016245		transmembrane amino acid transporter family protein	GO:0003333;;GO:0016021;;GO:0016020;;GO:0015171	biological_process;;cellular_component;;cellular_component;;molecular_function;;	BP:amino acid transmembrane transport;;CC:integral component of membrane;;CC:membrane;;MF:amino acid transmembrane transporter activity;;	K14207	SLC38A2, SNAT2	------	------	COG0814	S:Function unknown	XP_013451150.1	amino acid transporter AVT6A isoform X1 [Medicago truncatula]	sp|Q9LI61|AVT6A_ARATH;;	Amino acid transporter AVT6A OS=Arabidopsis thaliana OX=3702 GN=AVT6A PE=2 SV=1;;	PF01490.18;;PF03222.13	Aa_trans;;Trp_Tyr_perm	Transmembrane amino acid transporter protein;;Tryptophan/tyrosine permease family
MTR_2g023290		F0F1 ATP synthase subunit gamma	GO:0015986;;GO:0099132;;GO:0006754;;GO:0045261;;GO:0009535;;GO:0000275;;GO:0046933;;GO:0016787;;GO:0003677	biological_process;;deleted;;biological_process;;cellular_component;;cellular_component;;cellular_component;;molecular_function;;molecular_function;;molecular_function;;	BP:ATP synthesis coupled proton transport;;BP:old GO;;BP:ATP biosynthetic process;;CC:proton-transporting ATP synthase complex, catalytic core;;CC:chloroplast thylakoid membrane;;CC:mitochondrial proton-transporting ATP synthase complex, catalytic core;;MF:proton-transporting ATP synthase activity, rotational mechanism;;MF:hydrolase activity;;MF:DNA binding;;	K02115	ATPF1G, atpG	map00195;;map00190	Photosynthesis;;Oxidative phosphorylation	ENOG410XTBX;;COG0224	S:Function unknown;;C:Energy production and conversion	KEH36859.1	F0F1 ATP synthase subunit gamma [Medicago truncatula]	sp|P28552|ATPG_PEA;;	ATP synthase gamma chain, chloroplastic OS=Pisum sativum OX=3888 GN=ATPC PE=2 SV=1;;	PF00231.19	ATP-synt	ATP synthase
MTR_1g015000		Ctr family copper transporter	GO:0006878;;GO:0035434;;GO:0016020;;GO:0016021;;GO:0005886;;GO:0005375	biological_process;;biological_process;;cellular_component;;cellular_component;;cellular_component;;molecular_function;;	BP:cellular copper ion homeostasis;;BP:copper ion transmembrane transport;;CC:membrane;;CC:integral component of membrane;;CC:plasma membrane;;MF:copper ion transmembrane transporter activity;;	K14686	SLC31A1, CTR1	------	------	ENOG4111I8D	P:Inorganic ion transport and metabolism	XP_003588901.1	copper transporter 5 [Medicago truncatula]	sp|Q69P80|COP51_ORYSJ;;	Copper transporter 5.1 OS=Oryza sativa subsp. japonica OX=39947 GN=COPT5.1 PE=2 SV=1;;	PF04145.15	Ctr	Ctr copper transporter family
MTR_4g064963		Ctr family copper transporter	GO:0035434;;GO:0016020;;GO:0016021;;GO:0005375	biological_process;;cellular_component;;cellular_component;;molecular_function;;	BP:copper ion transmembrane transport;;CC:membrane;;CC:integral component of membrane;;MF:copper ion transmembrane transporter activity;;	K14686	SLC31A1, CTR1	------	------	ENOG4111I8D	S:Function unknown	XP_013456169.1	copper transporter 6 [Medicago truncatula]	sp|Q8GWP3|COPT6_ARATH;;	Copper transporter 6 OS=Arabidopsis thaliana OX=3702 GN=COPT6 PE=2 SV=1;;	PF04145.15	Ctr	Ctr copper transporter family
MTR_2g099550		import inner membrane translocase subunit TIM22	GO:0030150;;GO:0031305;;GO:0016021;;GO:0005744;;GO:0008320	biological_process;;cellular_component;;cellular_component;;cellular_component;;molecular_function;;	BP:protein import into mitochondrial matrix;;CC:integral component of mitochondrial inner membrane;;CC:integral component of membrane;;CC:mitochondrial inner membrane presequence translocase complex;;MF:protein transmembrane transporter activity;;	K17794	TIM23	------	------	COG5596	S:Function unknown	XP_003597557.1	mitochondrial import inner membrane translocase subunit TIM23-2 [Medicago truncatula]	sp|Q38820|TI232_ARATH;;	Mitochondrial import inner membrane translocase subunit TIM23-2 OS=Arabidopsis thaliana OX=3702 GN=TIM23-2 PE=1 SV=1;;	PF02466.19	Tim17	Tim17/Tim22/Tim23/Pmp24 family
MTR_5g032090		mechanosensitive ion channel-like protein	GO:0055085;;GO:0010020;;GO:0031969;;GO:0016021;;GO:0016020	biological_process;;biological_process;;cellular_component;;cellular_component;;cellular_component;;	BP:transmembrane transport;;BP:chloroplast fission;;CC:chloroplast membrane;;CC:integral component of membrane;;CC:membrane;;	------	------	------	------	COG0668	S:Function unknown	XP_003613048.2	mechanosensitive ion channel protein 2, chloroplastic [Medicago truncatula]	sp|Q56X46|MSL2_ARATH;;	Mechanosensitive ion channel protein 2, chloroplastic OS=Arabidopsis thaliana OX=3702 GN=MSL2 PE=2 SV=1;;	PF00924.18	MS_channel	Mechanosensitive ion channel
MTR_3g072110		transmembrane amino acid transporter family protein	GO:0003333;;GO:0016021;;GO:0016020;;GO:0015171	biological_process;;cellular_component;;cellular_component;;molecular_function;;	BP:amino acid transmembrane transport;;CC:integral component of membrane;;CC:membrane;;MF:amino acid transmembrane transporter activity;;	K14993	SLC38A6, SNAT6	------	------	COG0814	E:Amino acid transport and metabolism	XP_003601018.2	amino acid transporter AVT6C [Medicago truncatula]	sp|Q9LYM2|AVT6C_ARATH;;	Amino acid transporter AVT6C OS=Arabidopsis thaliana OX=3702 GN=AVT6C PE=2 SV=1;;	PF01490.18;;PF03222.13	Aa_trans;;Trp_Tyr_perm	Transmembrane amino acid transporter protein;;Tryptophan/tyrosine permease family
MTR_5g040610		ATP synthase epsilon chain	GO:0015986;;GO:0099132;;GO:0000275;;GO:0005739;;GO:0005753;;GO:0016787;;GO:0046933	biological_process;;deleted;;cellular_component;;cellular_component;;cellular_component;;molecular_function;;molecular_function;;	BP:ATP synthesis coupled proton transport;;BP:old GO;;CC:mitochondrial proton-transporting ATP synthase complex, catalytic core;;CC:mitochondrion;;CC:mitochondrial proton-transporting ATP synthase complex;;MF:hydrolase activity;;MF:proton-transporting ATP synthase activity, rotational mechanism;;	K02135	ATPeF1E, ATP5E, ATP15	map00190;;map04714	Oxidative phosphorylation;;Thermogenesis	ENOG410Y5P5	C:Energy production and conversion	XP_003613764.1	ATP synthase subunit epsilon, mitochondrial [Medicago truncatula]	sp|Q96253|ATP5E_ARATH;;	ATP synthase subunit epsilon, mitochondrial OS=Arabidopsis thaliana OX=3702 GN=At1g51650 PE=1 SV=3;;	PF04627.13	ATP-synt_Eps	Mitochondrial ATP synthase epsilon chain
MTR_5g024660		auxin efflux carrier family protein	GO:0055085;;GO:0016021;;GO:0016020	biological_process;;cellular_component;;cellular_component;;	BP:transmembrane transport;;CC:integral component of membrane;;CC:membrane;;	K07088	K07088	------	------	COG0679	S:Function unknown	XP_003612404.1	protein PIN-LIKES 7 [Medicago truncatula]	sp|Q9FKY4|PILS7_ARATH;;	Protein PIN-LIKES 7 OS=Arabidopsis thaliana OX=3702 GN=PILS7 PE=2 SV=1;;	PF03547.18	Mem_trans	Membrane transport protein
MTR_1g063370		membrane magnesium transporter	GO:0000272;;GO:0016020;;GO:0005794;;GO:0016021;;GO:0072546;;GO:0005886;;GO:0005769;;GO:0022890;;GO:0016161;;GO:0102229	biological_process;;cellular_component;;cellular_component;;cellular_component;;cellular_component;;cellular_component;;cellular_component;;molecular_function;;molecular_function;;molecular_function;;	BP:polysaccharide catabolic process;;CC:membrane;;CC:Golgi apparatus;;CC:integral component of membrane;;CC:ER membrane protein complex;;CC:plasma membrane;;CC:early endosome;;MF:inorganic cation transmembrane transporter activity;;MF:beta-amylase activity;;MF:amylopectin maltohydrolase activity;;	------	------	------	------	ENOG4111UG5;;ENOG410YTN3	S:Function unknown;;O:Posttranslational modification, protein turnover, chaperones	XP_013468168.1	membrane magnesium transporter [Medicago truncatula]	sp|Q2HIM5|MMGT_ARATH;;	Membrane magnesium transporter OS=Arabidopsis thaliana OX=3702 GN=At5g03345 PE=3 SV=1;;	PF10270.9	MMgT	Membrane magnesium transporter
MTR_4g008650		membrane calcium-translocating P-type ATPase	GO:0070588;;GO:0006816;;GO:0006811;;GO:0016021;;GO:0016020;;GO:0016787;;GO:0099132;;GO:0000166;;GO:0005516;;GO:0005388;;GO:0005524	biological_process;;biological_process;;biological_process;;cellular_component;;cellular_component;;molecular_function;;deleted;;molecular_function;;molecular_function;;molecular_function;;molecular_function;;	BP:calcium ion transmembrane transport;;BP:calcium ion transport;;BP:ion transport;;CC:integral component of membrane;;CC:membrane;;MF:hydrolase activity;;MF:old GO;;MF:nucleotide binding;;MF:calmodulin binding;;MF:calcium-transporting ATPase activity;;MF:ATP binding;;	K01537	E3.6.3.8	------	------	ENOG410XNNC	P:Inorganic ion transport and metabolism	XP_013454616.1	calcium-transporting ATPase 4, plasma membrane-type [Medicago truncatula]	sp|O22218|ACA4_ARATH;;	Calcium-transporting ATPase 4, plasma membrane-type OS=Arabidopsis thaliana OX=3702 GN=ACA4 PE=1 SV=1;;	PF00122.20;;PF00689.21;;PF13246.6;;PF12515.8;;PF00702.26;;PF00690.26;;PF08282.12	E1-E2_ATPase;;Cation_ATPase_C;;Cation_ATPase;;CaATP_NAI;;Hydrolase;;Cation_ATPase_N;;Hydrolase_3	E1-E2 ATPase;;Cation transporting ATPase, C-terminus;;Cation transport ATPase;;Ca2+-ATPase N terminal autoinhibitory domain;;haloacid dehalogenase-like hydrolase;;Cation transporter/ATPase, N-terminus;;haloacid dehalogenase-like hydrolase
MTR_3g462060		import receptor subunit TOM7-1	GO:0030150;;GO:0005742;;GO:0016021;;GO:0016020	biological_process;;cellular_component;;cellular_component;;cellular_component;;	BP:protein import into mitochondrial matrix;;CC:mitochondrial outer membrane translocase complex;;CC:integral component of membrane;;CC:membrane;;	K17771	TOM7	------	------	ENOG410Y3Q1	U:Intracellular trafficking, secretion, and vesicular transport	KEH34137.1	import receptor subunit TOM7-1 [Medicago truncatula]	sp|Q9ASY8|TOM71_ARATH;;	Mitochondrial import receptor subunit TOM7-1 OS=Arabidopsis thaliana OX=3702 GN=TOM7-1 PE=1 SV=1;;	PF08038.12	Tom7	TOM7 family
MTR_2g100380		ATP synthase G subunit family protein	GO:0015986;;GO:0000159;;GO:0099132;;GO:0000276;;GO:0019888;;GO:0015078	biological_process;;cellular_component;;deleted;;cellular_component;;molecular_function;;molecular_function;;	BP:ATP synthesis coupled proton transport;;CC:protein phosphatase type 2A complex;;CC:old GO;;CC:mitochondrial proton-transporting ATP synthase complex, coupling factor;;MF:protein phosphatase regulator activity;;MF:hydrogen ion transmembrane transporter activity;;	K02140	ATPeFG, ATP5L, ATP20	map00190;;map04714	Oxidative phosphorylation;;Thermogenesis	ENOG4111XRX	T:Signal transduction mechanisms	AES67883.2	ATP synthase G subunit family protein [Medicago truncatula]	------	------	PF04718.15	ATP-synt_G	Mitochondrial ATP synthase g subunit
MTR_0141s0020		cytochrome C biogenesis protein B	GO:0017004;;GO:0015886;;GO:0043190;;GO:0016021;;GO:0016020;;GO:0005739;;GO:0015232	biological_process;;biological_process;;cellular_component;;cellular_component;;cellular_component;;cellular_component;;molecular_function;;	BP:cytochrome complex assembly;;BP:heme transport;;CC:ATP-binding cassett;;CC:integral component of membrane;;CC:membrane;;CC:mitochondrion;;MF:heme transporter activity;;	------	------	------	------	ENOG410YFXA	O:Posttranslational modification, protein turnover, chaperones	YP_009237611.1	cytochrome c biogenesis B (mitochondrion) [Medicago truncatula]	sp|P93280|CCMB_ARATH;;	Putative cytochrome c biogenesis ccmB-like mitochondrial protein OS=Arabidopsis thaliana OX=3702 GN=CCMB PE=2 SV=2;;	------	------	------
MTR_5g009720		archaeal/vacuolar-type H+-ATPase subunit E	GO:0015991;;GO:0033178;;GO:0016787;;GO:0046961	biological_process;;cellular_component;;molecular_function;;molecular_function;;	BP:ATP hydrolysis coupled proton transport;;CC:proton-transporting two-sector ATPase complex, catalytic domain;;MF:hydrolase activity;;MF:proton-transporting ATPase activity, rotational mechanism;;	K02150	ATPeV1E, ATP6E	map04145;;map05165;;map00190	Phagosome;;Human papillomavirus infection;;Oxidative phosphorylation	COG1390	C:Energy production and conversion	XP_003611036.1	V-type proton ATPase subunit E [Medicago truncatula]	sp|Q39258|VATE1_ARATH;;	V-type proton ATPase subunit E1 OS=Arabidopsis thaliana OX=3702 GN=VHA-E1 PE=1 SV=2;;	PF01991.18	vATP-synt_E	ATP synthase
MTR_1g116380		peroxisome biogenesis protein	GO:0016558;;GO:0006625;;GO:0006513;;GO:0005778;;GO:0016020;;GO:0005777;;GO:0005779;;GO:1990429;;GO:0008022;;GO:0008270;;GO:0004842	biological_process;;biological_process;;biological_process;;cellular_component;;cellular_component;;cellular_component;;cellular_component;;cellular_component;;molecular_function;;molecular_function;;molecular_function;;	BP:protein import into peroxisome matrix;;BP:protein targeting to peroxisome;;BP:protein monoubiquitination;;CC:peroxisomal membrane;;CC:membrane;;CC:peroxisome;;CC:integral component of peroxisomal membrane;;CC:peroxisomal importomer complex;;MF:protein C-terminus binding;;MF:zinc ion binding;;MF:ubiquitin-protein transferase activity;;	K13345	PEX12, PAF3	map04146	Peroxisome	ENOG410Y4Q2	O:Posttranslational modification, protein turnover, chaperones	KEH44541.1	peroxisome biogenesis protein [Medicago truncatula]	sp|Q9M841|PEX12_ARATH;;	Peroxisome biogenesis protein 12 OS=Arabidopsis thaliana OX=3702 GN=PEX12 PE=1 SV=2;;	PF04757.14	Pex2_Pex12	Pex2 / Pex12 amino terminal region
MTR_4g129790		F0F1 ATP synthase subunit gamma	GO:0015986;;GO:0099132;;GO:0006754;;GO:0045261;;GO:0000275;;GO:0005730;;GO:0005618;;GO:0005753;;GO:0009507;;GO:0016787;;GO:0046933;;GO:0008270	biological_process;;deleted;;biological_process;;cellular_component;;cellular_component;;cellular_component;;cellular_component;;cellular_component;;cellular_component;;molecular_function;;molecular_function;;molecular_function;;	BP:ATP synthesis coupled proton transport;;BP:old GO;;BP:ATP biosynthetic process;;CC:proton-transporting ATP synthase complex, catalytic core;;CC:mitochondrial proton-transporting ATP synthase complex, catalytic core;;CC:nucleolus;;CC:cell wall;;CC:mitochondrial proton-transporting ATP synthase complex;;CC:chloroplast;;MF:hydrolase activity;;MF:proton-transporting ATP synthase activity, rotation…	K02136	ATPeF1G, ATP5C1, ATP3	map00190;;map04714	Oxidative phosphorylation;;Thermogenesis	COG0224	S:Function unknown	XP_013458562.1	ATP synthase subunit gamma, mitochondrial [Medicago truncatula]	sp|P26360|ATPG3_IPOBA;;	ATP synthase subunit gamma, mitochondrial OS=Ipomoea batatas OX=4120 GN=ATPC PE=1 SV=2;;	PF00231.19	ATP-synt	ATP synthase
MTR_4g098570		aluminum activated malate transporter family protein	GO:0015743;;GO:0016021;;GO:0016020;;GO:0009705	biological_process;;cellular_component;;cellular_component;;cellular_component;;	BP:malate transport;;CC:integral component of membrane;;CC:membrane;;CC:plant-type vacuole membrane;;	------	------	------	------	ENOG410XR8V	S:Function unknown	XP_003608627.1	aluminum-activated malate transporter 12 [Medicago truncatula]	sp|O49696|ALMTC_ARATH;;	Aluminum-activated malate transporter 12 OS=Arabidopsis thaliana OX=3702 GN=ALMT12 PE=2 SV=1;;	PF11744.8;;PF13515.6;;PF04632.12	ALMT;;FUSC_2;;FUSC	Aluminium activated malate transporter;;Fusaric acid resistance protein-like;;Fusaric acid resistance protein family
MTR_4g098620		TLD protein	GO:0015743;;GO:0016021;;GO:0009507;;GO:0009705	biological_process;;cellular_component;;cellular_component;;cellular_component;;	BP:malate transport;;CC:integral component of membrane;;CC:chloroplast;;CC:plant-type vacuole membrane;;	------	------	------	------	ENOG410XR8V;;ENOG4111WX6	S:Function unknown;;	XP_003608632.1	uncharacterized protein LOC11410461 [Medicago truncatula]	------	------	PF07534.16	TLD	TLD
MTR_5g025370		nodulin MtN21/EamA-like transporter family protein	GO:0055085;;GO:0016020;;GO:0016021;;GO:0022857	biological_process;;cellular_component;;cellular_component;;molecular_function;;	BP:transmembrane transport;;CC:membrane;;CC:integral component of membrane;;MF:transmembrane transporter activity;;	------	------	------	------	ENOG4110YP2	S:Function unknown	XP_003612470.1	WAT1-related protein At4g19185 [Medicago truncatula]	sp|Q8W4R9|WTR35_ARATH;;	WAT1-related protein At4g19185 OS=Arabidopsis thaliana OX=3702 GN=At4g19185 PE=2 SV=1;;	PF00892.20	EamA	EamA-like transporter family
MTR_4g018750		uncoupling protein	GO:0009750;;GO:0009853;;GO:1990542;;GO:0006839;;GO:0009749;;GO:0016021;;GO:0016020;;GO:0031966;;GO:0009506;;GO:0017077	biological_process;;biological_process;;biological_process;;biological_process;;biological_process;;cellular_component;;cellular_component;;cellular_component;;cellular_component;;molecular_function;;	BP:response to fructose;;BP:photorespiration;;BP:mitochondrial transmembrane transport;;BP:mitochondrial transport;;BP:response to glucose;;CC:integral component of membrane;;CC:membrane;;CC:mitochondrial membrane;;CC:plasmodesma;;MF:oxidative phosphorylation uncoupler activity;;	K15103	UCP2_3, SLC25A8_9	------	------	ENOG410XRV1	O:Posttranslational modification, protein turnover, chaperones	XP_003604785.1	mitochondrial uncoupling protein 1 [Medicago truncatula]	sp|O81845|PUMP1_ARATH;;	Mitochondrial uncoupling protein 1 OS=Arabidopsis thaliana OX=3702 GN=PUMP1 PE=1 SV=1;;	PF00153.27	Mito_carr	Mitochondrial carrier protein
MTR_2g007890		bidirectional sugar transporter	GO:0008643;;GO:0016020;;GO:0016021;;GO:0005886;;GO:0051119	biological_process;;cellular_component;;cellular_component;;cellular_component;;molecular_function;;	BP:carbohydrate transport;;CC:membrane;;CC:integral component of membrane;;CC:plasma membrane;;MF:sugar transmembrane transporter activity;;	K15382	SLC50A, SWEET	------	------	ENOG4111M4R	U:Intracellular trafficking, secretion, and vesicular transport	XP_003593107.1	bidirectional sugar transporter N3-like [Medicago truncatula]	sp|P0DKJ5|SWT15_VITVI;;	Bidirectional sugar transporter SWEET15 OS=Vitis vinifera OX=29760 GN=SWEET15 PE=3 SV=1;;	PF03083.16	MtN3_slv	Sugar efflux transporter for intercellular exchange
MTR_2g436730		multidrug resistance protein ABC transporter family protein	GO:0055085;;GO:0016021;;GO:0016020;;GO:0000325;;GO:0005774;;GO:0042626;;GO:0099131;;GO:0008559;;GO:0016887;;GO:0000166;;GO:0005524	biological_process;;cellular_component;;cellular_component;;cellular_component;;cellular_component;;molecular_function;;deleted;;molecular_function;;molecular_function;;molecular_function;;molecular_function;;	BP:transmembrane transport;;CC:integral component of membrane;;CC:membrane;;CC:plant-type vacuole;;CC:vacuolar membrane;;MF:ATPase activity, coupled to transmembrane movement of substances;;MF:old GO;;MF:xenobiotic-transporting ATPase activity;;MF:ATPase activity;;MF:nucleotide binding;;MF:ATP binding;;	K05666	ABCC2	map02010	ABC transporters	COG1132	V:Defense mechanisms	KEH37259.1	multidrug resistance protein ABC transporter family protein [Medicago truncatula]	sp|Q9LZJ5|AB14C_ARATH;;	ABC transporter C family member 14 OS=Arabidopsis thaliana OX=3702 GN=ABCC14 PE=1 SV=1;;	PF00664.23;;PF00005.27;;PF13304.6	ABC_membrane;;ABC_tran;;AAA_21	ABC transporter transmembrane region;;ABC transporter;;AAA domain, putative AbiEii toxin, Type IV TA system
MTR_1g030600		auxin-induced 5NG4-like protein	GO:0055085;;GO:0016020;;GO:0016021;;GO:0005886;;GO:0022857	biological_process;;cellular_component;;cellular_component;;cellular_component;;molecular_function;;	BP:transmembrane transport;;CC:membrane;;CC:integral component of membrane;;CC:plasma membrane;;MF:transmembrane transporter activity;;	------	------	------	------	ENOG410YBPN	S:Function unknown	XP_013466499.1	WAT1-related protein At4g08290 [Medicago truncatula]	sp|Q9SUF1|WTR31_ARATH;;	WAT1-related protein At4g08290 OS=Arabidopsis thaliana OX=3702 GN=At4g08290 PE=2 SV=1;;	PF00892.20;;PF03151.16	EamA;;TPT	EamA-like transporter family;;Triose-phosphate Transporter family
MTR_7g113680		nuclear transcription factor Y protein	GO:0055085;;GO:0005634;;GO:0016021;;GO:0046982	biological_process;;cellular_component;;cellular_component;;molecular_function;;	BP:transmembrane transport;;CC:nucleus;;CC:integral component of membrane;;MF:protein heterodimerization activity;;	K08066	NFYC	------	------	COG5208	K:Transcription	AES82522.1	nuclear transcription factor Y protein [Medicago truncatula]	sp|Q9ZVL3|NFYC3_ARATH;;	Nuclear transcription factor Y subunit C-3 OS=Arabidopsis thaliana OX=3702 GN=NFYC3 PE=1 SV=1;;	PF00808.23;;PF00125.24	CBFD_NFYB_HMF;;Histone	Histone-like transcription factor;;Core histone H2A/H2B/H3/H4
MTR_6g088450		polyol/monosaccharide transporter 1	GO:0008643;;GO:0055085;;GO:0016021;;GO:0016020;;GO:0005887;;GO:0005351;;GO:0005215;;GO:0022857	biological_process;;biological_process;;cellular_component;;cellular_component;;cellular_component;;molecular_function;;molecular_function;;molecular_function;;	BP:carbohydrate transport;;BP:transmembrane transport;;CC:integral component of membrane;;CC:membrane;;CC:integral component of plasma membrane;;MF:suga;;MF:transporter activity;;MF:transmembrane transporter activity;;	------	------	------	------	ENOG410XNQK	S:Function unknown	XP_003620669.1	polyol transporter 5 [Medicago truncatula]	sp|Q8VZ80|PLT5_ARATH;;	Polyol transporter 5 OS=Arabidopsis thaliana OX=3702 GN=PLT5 PE=1 SV=2;;	PF00083.24;;PF07690.16;;PF06609.13	Sugar_tr;;MFS_1;;TRI12	Sugar;;Major Facilitator Superfamily;;Fungal trichothecene efflux pump
MTR_2g026160		inositol transporter, putative	GO:0008643;;GO:0055085;;GO:0016021;;GO:0016020;;GO:0005887;;GO:0005215;;GO:0022857;;GO:0005366	biological_process;;biological_process;;cellular_component;;cellular_component;;cellular_component;;molecular_function;;molecular_function;;molecular_function;;	BP:carbohydrate transport;;BP:transmembrane transport;;CC:integral component of membrane;;CC:membrane;;CC:integral component of plasma membrane;;MF:transporter activity;;MF:transmembrane transporter activity;;MF:myo-inosito;;	K08150	SLC2A13, ITR	------	------	------	------	XP_003594252.1	inositol transporter 4 [Medicago truncatula]	sp|O23492|INT4_ARATH;;	Inositol transporter 4 OS=Arabidopsis thaliana OX=3702 GN=INT4 PE=1 SV=1;;	PF00083.24;;PF07690.16;;PF12832.7	Sugar_tr;;MFS_1;;MFS_1_like	Sugar;;Major Facilitator Superfamily;;MFS_1 like family
MTR_4g108240		ABC transporter A family protein	GO:1902358;;GO:0055085;;GO:0016021;;GO:0016020;;GO:0016787;;GO:0042626;;GO:0015419;;GO:0099133;;GO:0000166;;GO:0016887;;GO:0005524;;GO:0099131	biological_process;;biological_process;;cellular_component;;cellular_component;;molecular_function;;molecular_function;;molecular_function;;deleted;;molecular_function;;molecular_function;;molecular_function;;deleted;;	BP:sulfate transmembrane transport;;BP:transmembrane transport;;CC:integral component of membrane;;CC:membrane;;MF:hydrolase activity;;MF:ATPase activity, coupled to transmembrane movement of substances;;MF:ATPase-coupled sulfate transmembrane transporter activity;;MF:old GO;;MF:nucleotide binding;;MF:ATPase activity;;MF:ATP binding;;MF:old GO;;	------	------	------	------	COG1131;;ENOG410XR3G	V:Defense mechanisms;;S:Function unknown	XP_003609042.2	ABC transporter A family member 7 isoform X1 [Medicago truncatula]	sp|Q9STT5|AB7A_ARATH;;	ABC transporter A family member 7 OS=Arabidopsis thaliana OX=3702 GN=ABCA7 PE=3 SV=2;;	PF00005.27;;PF12698.7;;PF13304.6	ABC_tran;;ABC2_membrane_3;;AAA_21	ABC transporter;;ABC-2 family transporter protein;;AAA domain, putative AbiEii toxin, Type IV TA system
MTR_1g070385		P-loop nucleoside triphosphate hydrolase superfamily protein	GO:0016310;;GO:0055085;;GO:0016021;;GO:0016020;;GO:0016787;;GO:0016301;;GO:0015267;;GO:0005524	biological_process;;biological_process;;cellular_component;;cellular_component;;molecular_function;;molecular_function;;molecular_function;;molecular_function;;	BP:phosphorylation;;BP:transmembrane transport;;CC:integral component of membrane;;CC:membrane;;MF:hydrolase activity;;MF:kinase activity;;MF:channel activity;;MF:ATP binding;;	------	------	------	------	ENOG4111S2X	S:Function unknown	KEH42598.1	P-loop nucleoside triphosphate hydrolase superfamily protein [Medicago truncatula]	sp|Q8LAI1|NIP71_ARATH;;	Probable aquaporin NIP7-1 OS=Arabidopsis thaliana OX=3702 GN=NIP7-1 PE=2 SV=2;;	PF00230.20;;PF06414.12;;PF13671.6	MIP;;Zeta_toxin;;AAA_33	Major intrinsic protein;;Zeta toxin;;AAA domain
MTR_1g099580		SPX (SYG1/Pho81/XPR1) domain protein MFS transporter	GO:0055085;;GO:0016021;;GO:0016020	biological_process;;cellular_component;;cellular_component;;	BP:transmembrane transport;;CC:integral component of membrane;;CC:membrane;;	------	------	------	------	ENOG41101S9	T:Signal transduction mechanisms	XP_003592181.2	SPX domain-containing membrane protein At4g22990 [Medicago truncatula]	sp|Q93ZQ5|SPXM3_ARATH;;	SPX domain-containing membrane protein At4g22990 OS=Arabidopsis thaliana OX=3702 GN=At4g22990 PE=2 SV=2;;	PF07690.16;;PF03105.19;;PF00083.24	MFS_1;;SPX;;Sugar_tr	Major Facilitator Superfamily;;SPX domain;;Sugar
MTR_5g020270		sugar porter (SP) family MFS transporter	GO:0008643;;GO:0055085;;GO:0016021;;GO:0016020;;GO:0005215;;GO:0022857	biological_process;;biological_process;;cellular_component;;cellular_component;;molecular_function;;molecular_function;;	BP:carbohydrate transport;;BP:transmembrane transport;;CC:integral component of membrane;;CC:membrane;;MF:transporter activity;;MF:transmembrane transporter activity;;	K08145	SLC2A8, GLUT8	------	------	ENOG410XNQK	G:Carbohydrate transport and metabolism	XP_003612008.2	sugar transporter ERD6-like 6 isoform X1 [Medicago truncatula]	sp|Q9FRL3|ERDL6_ARATH;;	Sugar transporter ERD6-like 6 OS=Arabidopsis thaliana OX=3702 GN=At1g75220 PE=1 SV=1;;	PF00083.24;;PF07690.16	Sugar_tr;;MFS_1	Sugar;;Major Facilitator Superfamily
MTR_4g071445		MATE family efflux protein	GO:0006855;;GO:0055085;;GO:0042908;;GO:0016021;;GO:0016020;;GO:0015297;;GO:0015238;;GO:0042910	biological_process;;biological_process;;biological_process;;cellular_component;;cellular_component;;molecular_function;;molecular_function;;molecular_function;;	BP:drug transmembrane transport;;BP:transmembrane transport;;BP:xenobiotic transport;;CC:integral component of membrane;;CC:membrane;;MF:antiporter activity;;MF:drug transmembrane transporter activity;;MF:xenobiotic transporter activity;;	------	------	------	------	COG0534	V:Defense mechanisms	XP_013456434.1	protein DETOXIFICATION 46, chloroplastic [Medicago truncatula]	sp|Q8W4G3|DTX46_ARATH;;	Protein DETOXIFICATION 46, chloroplastic OS=Arabidopsis thaliana OX=3702 GN=DTX46 PE=2 SV=1;;	PF01554.18;;PF14667.6	MatE;;Polysacc_synt_C	MatE;;Polysaccharide biosynthesis C-terminal domain
MTR_4g071465		MATE family efflux protein	GO:0006855;;GO:0055085;;GO:0042908;;GO:0016021;;GO:0016020;;GO:0015297;;GO:0015238;;GO:0042910	biological_process;;biological_process;;biological_process;;cellular_component;;cellular_component;;molecular_function;;molecular_function;;molecular_function;;	BP:drug transmembrane transport;;BP:transmembrane transport;;BP:xenobiotic transport;;CC:integral component of membrane;;CC:membrane;;MF:antiporter activity;;MF:drug transmembrane transporter activity;;MF:xenobiotic transporter activity;;	------	------	------	------	COG0534	V:Defense mechanisms	KEH30467.1	MATE family efflux protein [Medicago truncatula]	sp|Q8W4G3|DTX46_ARATH;;	Protein DETOXIFICATION 46, chloroplastic OS=Arabidopsis thaliana OX=3702 GN=DTX46 PE=2 SV=1;;	PF01554.18;;PF14667.6	MatE;;Polysacc_synt_C	MatE;;Polysaccharide biosynthesis C-terminal domain
MTR_8g020800		intermembrane space import and assembly protein	GO:0045041;;GO:0006625;;GO:0055114;;GO:0005777;;GO:0005623;;GO:0005739;;GO:0015035	biological_process;;biological_process;;biological_process;;cellular_component;;cellular_component;;cellular_component;;molecular_function;;	BP:protein import into mitochondrial intermembrane space;;BP:protein targeting to peroxisome;;BP:oxidation-reduction process;;CC:peroxisome;;CC:cell;;CC:mitochondrion;;MF:protein disulfide oxidoreductase activity;;	K17782	MIA40, CHCHD4	------	------	ENOG4111V0I	O:Posttranslational modification, protein turnover, chaperones	XP_003627292.1	mitochondrial intermembrane space import and assembly protein 40 homolog [Medicago truncatula]	sp|Q8GYJ4|MIA40_ARATH;;	Mitochondrial intermembrane space import and assembly protein 40 homolog OS=Arabidopsis thaliana OX=3702 GN=MIA40 PE=2 SV=1;;	PF06747.13	CHCH	CHCH domain
MTR_2g093640		nitrate excretion transporter 1	GO:0055085;;GO:0016021;;GO:0016020;;GO:0005886;;GO:0015333;;GO:0022857;;GO:1904680;;GO:0035673	biological_process;;cellular_component;;cellular_component;;cellular_component;;molecular_function;;molecular_function;;molecular_function;;molecular_function;;	BP:transmembrane transport;;CC:integral component of membrane;;CC:membrane;;CC:plasma membrane;;MF:peptid;;MF:transmembrane transporter activity;;MF:peptide transmembrane transporter activity;;MF:oligopeptide transmembrane transporter activity;;	K14638	SLC15A3_4, PHT	------	------	COG3104	E:Amino acid transport and metabolism	AES67434.1	nitrate excretion transporter 1 [Medicago truncatula]	sp|Q9M175|PTR39_ARATH;;	Protein NRT1/ PTR FAMILY 2.3 OS=Arabidopsis thaliana OX=3702 GN=NPF2.3 PE=2 SV=1;;	PF00854.21	PTR2	POT family
MTR_5g064600		cytochrome C oxidase, subunit VIb family protein	GO:1902600;;GO:0022900;;GO:0009853;;GO:0009651;;GO:0055114;;GO:0009535;;GO:0005739;;GO:0009579;;GO:0009507;;GO:0004129;;GO:0005507;;GO:0016491	biological_process;;biological_process;;biological_process;;biological_process;;biological_process;;cellular_component;;cellular_component;;cellular_component;;cellular_component;;molecular_function;;molecular_function;;molecular_function;;	BP:hydrogen ion transmembrane transport;;BP:electron transport chain;;BP:photorespiration;;BP:response to salt stress;;BP:oxidation-reduction process;;CC:chloroplast thylakoid membrane;;CC:mitochondrion;;CC:thylakoid;;CC:chloroplast;;MF:cytochrome-c oxidase activity;;MF:copper ion binding;;MF:oxidoreductase activity;;	K02267	COX6B	map00190;;map04714	Oxidative phosphorylation;;Thermogenesis	ENOG41121WM	O:Posttranslational modification, protein turnover, chaperones	XP_003615162.1	cytochrome c oxidase subunit 6b-1 [Medicago truncatula]	sp|Q9S7L9|CX6B1_ARATH;;	Cytochrome c oxidase subunit 6b-1 OS=Arabidopsis thaliana OX=3702 GN=COX6B-1 PE=1 SV=1;;	PF02297.17	COX6B	Cytochrome oxidase c subunit VIb
MTR_1g059080		MFS transporter	GO:0055085;;GO:0016021;;GO:0016020	biological_process;;cellular_component;;cellular_component;;	BP:transmembrane transport;;CC:integral component of membrane;;CC:membrane;;	------	------	------	------	ENOG41123EZ;;ENOG410Y8WV	S:Function unknown;;	XP_003590365.1	protein NUCLEAR FUSION DEFECTIVE 4 [Medicago truncatula]	sp|F4I9E1|NFD4_ARATH;;	Protein NUCLEAR FUSION DEFECTIVE 4 OS=Arabidopsis thaliana OX=3702 GN=NFD4 PE=3 SV=1;;	PF06813.13	Nodulin-like	Nodulin-like
MTR_3g094270		nucleotide/sugar transporter family protein	GO:0008643;;GO:0005794;;GO:0016020;;GO:0016021;;GO:0015297;;GO:0005338;;GO:0022857;;GO:0005464	biological_process;;cellular_component;;cellular_component;;cellular_component;;molecular_function;;molecular_function;;molecular_function;;molecular_function;;	BP:carbohydrate transport;;CC:Golgi apparatus;;CC:membrane;;CC:integral component of membrane;;MF:antiporter activity;;MF:nucleotide-sugar transmembrane transporter activity;;MF:transmembrane transporter activity;;MF:UDP-xylose transmembrane transporter activity;;	K15285	SLC35E3	------	------	ENOG410XP1S	S:Function unknown	XP_013461535.1	UDP-xylose transporter 3 [Medicago truncatula]	sp|Q8RXL8|UXT3_ARATH;;	UDP-xylose transporter 3 OS=Arabidopsis thaliana OX=3702 GN=UXT3 PE=1 SV=1;;	PF03151.16;;PF00892.20	TPT;;EamA	Triose-phosphate Transporter family;;EamA-like transporter family
MTR_6g047610		MATE efflux family protein	GO:0006855;;GO:0055085;;GO:0042908;;GO:0016021;;GO:0016020;;GO:0015297;;GO:0015238;;GO:0042910	biological_process;;biological_process;;biological_process;;cellular_component;;cellular_component;;molecular_function;;molecular_function;;molecular_function;;	BP:drug transmembrane transport;;BP:transmembrane transport;;BP:xenobiotic transport;;CC:integral component of membrane;;CC:membrane;;MF:antiporter activity;;MF:drug transmembrane transporter activity;;MF:xenobiotic transporter activity;;	K03327	TC.MATE, SLC47A, norM, mdtK, dinF	------	------	COG0534	V:Defense mechanisms	XP_013452177.1	protein DETOXIFICATION 35 [Medicago truncatula]	sp|F4JH46|DTX34_ARATH;;	Protein DETOXIFICATION 34 OS=Arabidopsis thaliana OX=3702 GN=DTX34 PE=2 SV=1;;	PF01554.18	MatE	MatE
MTR_5g086610		ERD (early-responsive to dehydration stress) family protein	GO:0016021;;GO:0016020;;GO:0005886;;GO:0005227	cellular_component;;cellular_component;;cellular_component;;molecular_function;;	CC:integral component of membrane;;CC:membrane;;CC:plasma membrane;;MF:calcium activated cation channel activity;;	------	------	------	------	COG5594	S:Function unknown	XP_003616997.1	CSC1-like protein At3g21620 [Medicago truncatula]	sp|Q9LVE4|CSCL4_ARATH;;	CSC1-like protein At3g21620 OS=Arabidopsis thaliana OX=3702 GN=At3g21620 PE=2 SV=1;;	PF02714.15;;PF13967.6;;PF14703.6;;PF04547.12	RSN1_7TM;;RSN1_TM;;PHM7_cyt;;Anoctamin	Calcium-dependent channel, 7TM region, putative phosphate;;Late exocytosis, associated with Golgi transport;;Cytosolic domain of 10TM putative phosphate transporter;;Calcium-activated chloride channel
MTR_3g033730		transmembrane amino acid transporter family protein	GO:0003333;;GO:0016021;;GO:0016020;;GO:0005886;;GO:0015171	biological_process;;cellular_component;;cellular_component;;cellular_component;;molecular_function;;	BP:amino acid transmembrane transport;;CC:integral component of membrane;;CC:membrane;;CC:plasma membrane;;MF:amino acid transmembrane transporter activity;;	K15015	SLC32A, VGAT	------	------	COG0814	E:Amino acid transport and metabolism	XP_003599464.2	amino acid transporter AVT1I [Medicago truncatula]	sp|F4J1Q9|AVT1I_ARATH;;	Amino acid transporter AVT1I OS=Arabidopsis thaliana OX=3702 GN=AVT1I PE=3 SV=1;;	PF01490.18	Aa_trans	Transmembrane amino acid transporter protein
MTR_4g131920		sucrose transporter 2	GO:0015770;;GO:0016021;;GO:0016020;;GO:0005887;;GO:0008515	biological_process;;cellular_component;;cellular_component;;cellular_component;;molecular_function;;	BP:sucrose transport;;CC:integral component of membrane;;CC:membrane;;CC:integral component of plasma membrane;;MF:sucrose transmembrane transporter activity;;	K15378	SLC45A1_2_4	------	------	ENOG410XPTR	U:Intracellular trafficking, secretion, and vesicular transport	XP_003610412.1	sucrose transport protein SUC8 isoform X1 [Medicago truncatula]	sp|Q39232|SUC1_ARATH;;	Sucrose transport protein SUC1 OS=Arabidopsis thaliana OX=3702 GN=SUC1 PE=1 SV=1;;	PF13347.6	MFS_2	MFS/sugar transport protein
MTR_6g015680		disease resistance protein (TIR-NBS-LRR class)	GO:0030001;;GO:0007165;;GO:0043531;;GO:0005515;;GO:0003677;;GO:0046872	biological_process;;biological_process;;molecular_function;;molecular_function;;molecular_function;;molecular_function;;	BP:metal ion transport;;BP:signal transduction;;MF:ADP binding;;MF:protein binding;;MF:DNA binding;;MF:metal ion binding;;	------	------	------	------	ENOG4112BMQ;;ENOG4111VMD	S:Function unknown;;	XP_013451069.1	TMV resistance protein N isoform X1 [Medicago truncatula]	sp|Q40392|TMVRN_NICGU;;	TMV resistance protein N OS=Nicotiana glutinosa OX=35889 GN=N PE=1 SV=1;;	PF01582.20;;PF00931.22;;PF13676.6;;PF13855.6	TIR;;NB-ARC;;TIR_2;;LRR_8	TIR domain;;NB-ARC domain;;TIR domain;;Leucine rich repeat
MTR_5g019350		PPR containing plant-like protein	GO:0051560;;GO:0016021;;GO:0005739;;GO:0015292	biological_process;;cellular_component;;cellular_component;;molecular_function;;	BP:mitochondrial calcium ion homeostasis;;CC:integral component of membrane;;CC:mitochondrion;;MF:uniporter activity;;	K20858	MCU	map04218	Cellular senescence	ENOG410Y3YU	I:Lipid transport and metabolism	XP_003611914.2	calcium uniporter protein 2, mitochondrial [Medicago truncatula]	sp|O64823|MCU2_ARATH;;	Calcium uniporter protein 2, mitochondrial OS=Arabidopsis thaliana OX=3702 GN=At2g23790 PE=2 SV=1;;	PF04678.13	MCU	Mitochondrial calcium uniporter
MTR_8g069470		MATE efflux family protein	GO:0006855;;GO:0055085;;GO:0042908;;GO:0016021;;GO:0016020;;GO:0005774;;GO:0015297;;GO:0015238;;GO:0042910	biological_process;;biological_process;;biological_process;;cellular_component;;cellular_component;;cellular_component;;molecular_function;;molecular_function;;molecular_function;;	BP:drug transmembrane transport;;BP:transmembrane transport;;BP:xenobiotic transport;;CC:integral component of membrane;;CC:membrane;;CC:vacuolar membrane;;MF:antiporter activity;;MF:drug transmembrane transporter activity;;MF:xenobiotic transporter activity;;	K03327	TC.MATE, SLC47A, norM, mdtK, dinF	------	------	COG0534	S:Function unknown	XP_003628949.1	protein DETOXIFICATION 29 [Medicago truncatula]	sp|Q38956|DTX29_ARATH;;	Protein DETOXIFICATION 29 OS=Arabidopsis thaliana OX=3702 GN=DTX29 PE=1 SV=1;;	PF01554.18	MatE	MatE
MTR_8g070510		EF hand calcium-binding family protein	GO:0009827;;GO:0010583;;GO:0009860;;GO:0010359;;GO:0019722;;GO:0000041;;GO:0009407;;GO:0009693;;GO:0005509	biological_process;;biological_process;;biological_process;;biological_process;;biological_process;;biological_process;;biological_process;;biological_process;;molecular_function;;	BP:plant-type cell wall modification;;BP:response to cyclopentenone;;BP:pollen tube growth;;BP:regulation of anion channel activity;;BP:calcium-mediated signaling;;BP:transition metal ion transport;;BP:toxin catabolic process;;BP:ethylene biosynthetic process;;MF:calcium ion binding;;	K13448	CML	map04626	Plant-pathogen interaction	COG5126;;COG5126;;COG5126	D:Cell cycle control, cell division, chromosome partitioning;;T:Signal transduction mechanisms;;Z:Cytoskeleton	XP_024629264.1	probable calcium-binding protein CML21 isoform X1 [Medicago truncatula]	sp|Q52K82|CML21_ARATH;;	Probable calcium-binding protein CML21 OS=Arabidopsis thaliana OX=3702 GN=CML21 PE=2 SV=1;;	PF00036.32;;PF13405.6;;PF13499.6;;PF13833.6;;PF13202.6;;PF10591.9	EF-hand_1;;EF-hand_6;;EF-hand_7;;EF-hand_8;;EF-hand_5;;SPARC_Ca_bdg	EF hand;;EF-hand domain;;EF-hand domain pair;;EF-hand domain pair;;EF hand;;Secreted protein acidic and rich in cysteine Ca binding region
MTR_7g099820		cation/H+ exchanger 3	GO:1902600;;GO:0006812;;GO:0055085;;GO:0016021;;GO:0016020;;GO:0015299	biological_process;;biological_process;;biological_process;;cellular_component;;cellular_component;;molecular_function;;	BP:hydrogen ion transmembrane transport;;BP:cation transport;;BP:transmembrane transport;;CC:integral component of membrane;;CC:membrane;;MF:solut;;	------	------	------	------	COG0475	P:Inorganic ion transport and metabolism	XP_003625497.1	cation/H(+) antiporter 20 isoform X2 [Medicago truncatula]	sp|Q9M353|CHX20_ARATH;;	Cation/;;	PF00999.21	Na_H_Exchanger	Sodium/hydrogen exchanger family
MTR_1g041695		phosphate transporter PHO1-like protein	GO:0006817;;GO:0016036;;GO:0005794;;GO:0016020;;GO:0016021;;GO:0005802;;GO:0005886;;GO:0000822;;GO:0015114	biological_process;;biological_process;;cellular_component;;cellular_component;;cellular_component;;cellular_component;;cellular_component;;molecular_function;;molecular_function;;	BP:phosphate ion transport;;BP:cellular response to phosphate starvation;;CC:Golgi apparatus;;CC:membrane;;CC:integral component of membrane;;CC:trans-Golgi network;;CC:plasma membrane;;MF:inositol hexakisphosphate binding;;MF:phosphate ion transmembrane transporter activity;;	------	------	------	------	COG5409	S:Function unknown	XP_013467061.1	phosphate transporter PHO1 [Medicago truncatula]	sp|Q8S403|PHO1_ARATH;;	Phosphate transporter PHO1 OS=Arabidopsis thaliana OX=3702 GN=PHO1 PE=1 SV=1;;	PF03124.14;;PF03105.19	EXS;;SPX	EXS family;;SPX domain
MTR_3g049400		glucose-6-phosphate/phosphate translocator-like protein	GO:0055085;;GO:0005794;;GO:0016021;;GO:0016020;;GO:0015297;;GO:0071917;;GO:0015120;;GO:0022857	biological_process;;cellular_component;;cellular_component;;cellular_component;;molecular_function;;molecular_function;;molecular_function;;molecular_function;;	BP:transmembrane transport;;CC:Golgi apparatus;;CC:integral component of membrane;;CC:membrane;;MF:antiporter activity;;MF:triose-phosphate transmembrane transporter activity;;MF:phosphoglycerate transmembrane transporter activity;;MF:transmembrane transporter activity;;	K15283	SLC35E1	------	------	ENOG410XP1S	S:Function unknown	XP_003599946.1	glucose-6-phosphate/phosphate translocator 1, chloroplastic [Medicago truncatula]	sp|Q9M5A9|GPT1_ARATH;;	Glucose-6-phosphate/phosphate translocator 1, chloroplastic OS=Arabidopsis thaliana OX=3702 GN=GPT1 PE=2 SV=1;;	PF03151.16;;PF00892.20;;PF08449.11	TPT;;EamA;;UAA	Triose-phosphate Transporter family;;EamA-like transporter family;;UAA transporter family
MTR_1g016120		ZIP zinc/iron transport family protein	GO:0006811;;GO:0055085;;GO:0030001;;GO:0071577;;GO:0016020;;GO:0016021;;GO:0005385;;GO:0046873	biological_process;;biological_process;;biological_process;;biological_process;;cellular_component;;cellular_component;;molecular_function;;molecular_function;;	BP:ion transport;;BP:transmembrane transport;;BP:metal ion transport;;BP:zinc II ion transmembrane transport;;CC:membrane;;CC:integral component of membrane;;MF:zinc ion transmembrane transporter activity;;MF:metal ion transmembrane transporter activity;;	K14709	SLC39A1_2_3, ZIP1_2_3	------	------	ENOG4111GP2	D:Cell cycle control, cell division, chromosome partitioning	XP_003588989.1	zinc transporter 4, chloroplastic [Medicago truncatula]	sp|O04089|ZIP4_ARATH;;	Zinc transporter 4, chloroplastic OS=Arabidopsis thaliana OX=3702 GN=ZIP4 PE=2 SV=1;;	PF02535.22	Zip	ZIP Zinc transporter
MTR_2g080980		cotton fiber	GO:0015824;;GO:0016021;;GO:0016020	biological_process;;cellular_component;;cellular_component;;	BP:proline transport;;CC:integral component of membrane;;CC:membrane;;	------	------	------	------	ENOG410ZK5T	U:Intracellular trafficking, secretion, and vesicular transport	XP_003596479.1	uncharacterized protein LOC11416475 [Medicago truncatula]	------	------	PF05553.11;;PF14364.6	DUF761;;DUF4408	Cotton fibre expressed protein;;Domain of unknown function
MTR_4g116190		calcium-binding EF hand protein	GO:0006851;;GO:0005509	biological_process;;molecular_function;;	BP:mitochondrial calcium ion transport;;MF:calcium ion binding;;	------	------	------	------	ENOG410ZSC1	S:Function unknown	XP_003609483.1	calcium uptake protein, mitochondrial [Medicago truncatula]	sp|Q9SZ45|MICU_ARATH;;	Calcium uptake protein, mitochondrial OS=Arabidopsis thaliana OX=3702 GN=MICU PE=2 SV=1;;	PF00036.32;;PF13405.6;;PF13499.6;;PF13833.6;;PF13202.6	EF-hand_1;;EF-hand_6;;EF-hand_7;;EF-hand_8;;EF-hand_5	EF hand;;EF-hand domain;;EF-hand domain pair;;EF-hand domain pair;;EF hand
MTR_0082s0160		cytochrome C oxidase subunit 3	GO:0015986;;GO:1902600;;GO:0006123;;GO:0019646;;GO:0009060;;GO:0055114;;GO:0022904;;GO:0045263;;GO:0016021;;GO:0016020;;GO:0005739;;GO:0005743;;GO:0004129;;GO:0015453;;GO:0016491;;GO:0015078;;GO:0015002;;GO:0009055	biological_process;;biological_process;;biological_process;;biological_process;;biological_process;;biological_process;;biological_process;;cellular_component;;cellular_component;;cellular_component;;cellular_component;;cellular_component;;molecular_function;;molecular_function;;molecular_function;;molecular_function;;molecular_function;;molecular_function;;	BP:ATP synthesis coupled proton transport;;BP:hydrogen ion transmembrane transport;;BP:mitochondrial electron transport, cytochrome c to oxygen;;BP:aerobic electron transport chain;;BP:aerobic respiration;;BP:oxidation-reduction process;;BP:respiratory electron transport chain;;CC:proton-transporting ATP synthase complex, coupling factor;;CC:integral component of membrane;;CC:membrane;;CC:mitocho…	K02262	COX3	map00190;;map04714	Oxidative phosphorylation;;Thermogenesis	COG1845	C:Energy production and conversion	KEH16856.1	cytochrome C oxidase subunit 3 [Medicago truncatula]	sp|Q03227|COX3_VICFA;;	Cytochrome c oxidase subunit 3 OS=Vicia faba OX=3906 GN=COX3 PE=3 SV=1;;	PF00510.18	COX3	Cytochrome c oxidase subunit III
MTR_6g075290		cyclic nucleotide-gated cation channel protein	GO:0006811;;GO:0055085;;GO:0034220;;GO:0016021;;GO:0016020;;GO:0005216	biological_process;;biological_process;;biological_process;;cellular_component;;cellular_component;;molecular_function;;	BP:ion transport;;BP:transmembrane transport;;BP:ion transmembrane transport;;CC:integral component of membrane;;CC:membrane;;MF:ion channel activity;;	K05391	CNGC	map04626	Plant-pathogen interaction	ENOG410XPSE	S:Function unknown	XP_024641833.1	probable cyclic nucleotide-gated ion channel 20, chloroplastic [Medicago truncatula]	sp|Q9LD37|CNG20_ARATH;;	Probable cyclic nucleotide-gated ion channel 20, chloroplastic OS=Arabidopsis thaliana OX=3702 GN=CNGC20 PE=2 SV=1;;	PF00520.31	Ion_trans	Ion transport protein
MTR_1008s0010		ABC transporter C family protein	GO:0016021;;GO:0008559;;GO:0016887;;GO:0005524;;GO:0042626	cellular_component;;molecular_function;;molecular_function;;molecular_function;;molecular_function;;	CC:integral component of membrane;;MF:xenobiotic-transporting ATPase activity;;MF:ATPase activity;;MF:ATP binding;;MF:ATPase activity, coupled to transmembrane movement of substances;;	K05665	ABCC1	map02010	ABC transporters	COG1132	V:Defense mechanisms	RHN38804.1	putative xenobiotic-transporting ATPase [Medicago truncatula]	sp|Q7FB56|AB15C_ARATH;;	Putative ABC transporter C family member 15 OS=Arabidopsis thaliana OX=3702 GN=ABCC15 PE=5 SV=2;;	PF00005.27	ABC_tran	ABC transporter
MTR_8g090225		50S ribosomal protein L23	GO:0010584;;GO:1902183;;GO:1903070;;GO:0006412;;GO:1990569;;GO:0032543;;GO:1903857;;GO:0005622;;GO:0005840;;GO:0016021;;GO:0005762;;GO:0000139;;GO:0005783;;GO:0005463;;GO:0003735	biological_process;;biological_process;;biological_process;;biological_process;;biological_process;;biological_process;;biological_process;;cellular_component;;cellular_component;;cellular_component;;cellular_component;;cellular_component;;cellular_component;;molecular_function;;molecular_function;;	BP:pollen exine formation;;BP:regulation of shoot apical meristem development;;BP:negative regulation of ER-associated ubiquitin-dependent protein catabolic process;;BP:translation;;BP:UDP-N-acetylglucosamine transmembrane transport;;BP:mitochondrial translation;;BP:negative regulation of cytokinin dehydrogenase activity;;CC:intracellular;;CC:ribosome;;CC:integral component of membrane;;CC:mitoch…	K02892	RP-L23, MRPL23, rplW	map03010	Ribosome	ENOG4111IAB	S:Function unknown	KEH20838.1	50S ribosomal protein L23 [Medicago truncatula]	sp|Q8D210|RL23_WIGBR;;	50S ribosomal protein L23 OS=Wigglesworthia glossinidia brevipalpis OX=36870 GN=rplW PE=3 SV=1;;	PF00276.20	Ribosomal_L23	Ribosomal protein L23
MTR_5g014100		anionic peroxidase swpb3 protein	GO:0000041;;GO:0006979;;GO:0098869;;GO:0042744;;GO:0055114;;GO:0005576;;GO:0020037;;GO:0046872;;GO:0004601;;GO:0016491	biological_process;;biological_process;;biological_process;;biological_process;;biological_process;;cellular_component;;molecular_function;;molecular_function;;molecular_function;;molecular_function;;	BP:transition metal ion transport;;BP:response to oxidative stress;;BP:cellular oxidant detoxification;;BP:hydrogen peroxide catabolic process;;BP:oxidation-reduction process;;CC:extracellular region;;MF:heme binding;;MF:metal ion binding;;MF:peroxidase activity;;MF:oxidoreductase activity;;	K00430	E1.11.1.7	map00940	Phenylpropanoid biosynthesis	ENOG410YDW3	G:Carbohydrate transport and metabolism	XP_003611449.1	peroxidase 20 [Medicago truncatula]	sp|Q9SLH7|PER20_ARATH;;	Peroxidase 20 OS=Arabidopsis thaliana OX=3702 GN=PER20 PE=2 SV=1;;	PF00141.23	peroxidase	Peroxidase
MTR_0041s0140		heavy metal-associated domain protein	GO:0030001;;GO:0046872	biological_process;;molecular_function;;	BP:metal ion transport;;MF:metal ion binding;;	------	------	------	------	COG2608	O:Posttranslational modification, protein turnover, chaperones	KEH17134.1	heavy metal-associated domain protein, partial [Medicago truncatula]	sp|Q9SJL2|HIP5_ARATH;;	Heavy metal-associated isoprenylated plant protein 5 OS=Arabidopsis thaliana OX=3702 GN=HIPP05 PE=1 SV=2;;	PF00403.26	HMA	Heavy-metal-associated domain
MTR_6g007793		SecE/sec61-gamma subunit of protein translocation complex protein	GO:0071806;;GO:0090351;;GO:0006605;;GO:0006886;;GO:0016020;;GO:0016021;;GO:0009528;;GO:0005623;;GO:0016301	biological_process;;biological_process;;biological_process;;biological_process;;cellular_component;;cellular_component;;cellular_component;;cellular_component;;molecular_function;;	BP:protein transmembrane transport;;BP:seedling development;;BP:protein targeting;;BP:intracellular protein transport;;CC:membrane;;CC:integral component of membrane;;CC:plastid inner membrane;;CC:cell;;MF:kinase activity;;	------	------	------	------	ENOG410Y190	S:Function unknown	XP_013450863.1	uncharacterized protein LOC25495222 [Medicago truncatula]	------	------	PF00584.20	SecE	SecE/Sec61-gamma subunits of protein translocation complex
MTR_8g063840		potassium transporter-like protein	GO:0071805;;GO:0006813;;GO:0006811;;GO:0016021;;GO:0016020;;GO:0009507;;GO:0015079	biological_process;;biological_process;;biological_process;;cellular_component;;cellular_component;;cellular_component;;molecular_function;;	BP:potassium ion transmembrane transport;;BP:potassium ion transport;;BP:ion transport;;CC:integral component of membrane;;CC:membrane;;CC:chloroplast;;MF:potassium ion transmembrane transporter activity;;	K03549	kup	------	------	COG3158	P:Inorganic ion transport and metabolism	XP_013445933.1	putative potassium transporter 12 [Medicago truncatula]	sp|O80739|POT12_ARATH;;	Putative potassium transporter 12 OS=Arabidopsis thaliana OX=3702 GN=POT12 PE=1 SV=2;;	PF02705.16	K_trans	K+ potassium transporter
MTR_4g030930		molybdenum cofactor sulfurase	GO:0006777;;GO:0009867;;GO:0006612;;GO:0000303;;GO:0031348;;GO:0009414;;GO:0008219;;GO:0045037;;GO:0042538;;GO:0009734;;GO:0009862;;GO:0000165;;GO:0018315;;GO:0010182;;GO:0043069;;GO:0010118;;GO:0009409;;GO:0010363;;GO:0030968;;GO:0000956;;GO:0030170;;GO:0016829;;GO:0016740;;GO:0003824;;GO:0030151;;GO:0008265;;GO:0102867;;GO:0009000	biological_process;;biological_process;;biological_process;;biological_process;;biological_process;;biological_process;;biological_process;;biological_process;;biological_process;;biological_process;;biological_process;;biological_process;;biological_process;;biological_process;;biological_process;;biological_process;;biological_process;;biological_process;;biological_process;;biological_process;…	BP:Mo-molybdopterin cofactor biosynthetic process;;BP:jasmonic acid mediated signaling pathway;;BP:protein targeting to membrane;;BP:response to superoxide;;BP:negative regulation of defense response;;BP:response to water deprivation;;BP:cell death;;BP:protein import into chloroplast stroma;;BP:hyperosmotic salinity response;;BP:auxin-activated signaling pathway;;BP:systemic acquired resistance, …	K15631	ABA3	map00790	Folate biosynthesis	COG3217	S:Function unknown	RHN59482.1	putative molybdenum cofactor sulfurtransferase [Medicago truncatula]	sp|Q9C5X8|MOCOS_ARATH;;	Molybdenum cofactor sulfurase OS=Arabidopsis thaliana OX=3702 GN=ABA3 PE=1 SV=1;;	PF00266.19;;PF03473.17;;PF03476.16	Aminotran_5;;MOSC;;MOSC_N	Aminotransferase class-V;;MOSC domain;;MOSC N-terminal beta barrel domain
MTR_4g055610		transmembrane amino acid transporter family protein	GO:0003333;;GO:0016020;;GO:0005886;;GO:0016021;;GO:0015171;;GO:0015185	biological_process;;cellular_component;;cellular_component;;cellular_component;;molecular_function;;molecular_function;;	BP:amino acid transmembrane transport;;CC:membrane;;CC:plasma membrane;;CC:integral component of membrane;;MF:amino acid transmembrane transporter activity;;MF:gamma-aminobutyric acid transmembrane transporter activity;;	------	------	------	------	COG0814	M:Cell wall/membrane/envelope biogenesis	XP_003606284.1	GABA transporter 1 [Medicago truncatula]	sp|F4HW02|GAT1_ARATH;;	GABA transporter 1 OS=Arabidopsis thaliana OX=3702 GN=GAT1 PE=1 SV=1;;	PF01490.18	Aa_trans	Transmembrane amino acid transporter protein
MTR_3g082750		unusual kinase, putative	GO:0016310;;GO:0070574;;GO:0016021;;GO:0016020;;GO:0015434;;GO:0016301;;GO:0099132;;GO:0016787	biological_process;;biological_process;;cellular_component;;cellular_component;;molecular_function;;molecular_function;;deleted;;molecular_function;;	BP:phosphorylation;;BP:cadmium ion transmembrane transport;;CC:integral component of membrane;;CC:membrane;;MF:cadmium-transporting ATPase activity;;MF:kinase activity;;MF:old GO;;MF:hydrolase activity;;	------	------	------	------	COG0661	S:Function unknown	XP_024635775.1	protein ACTIVITY OF BC1 COMPLEX KINASE 7, chloroplastic [Medicago truncatula]	sp|B9DGY1|AB1K7_ARATH;;	Protein ACTIVITY OF BC1 COMPLEX KINASE 7, chloroplastic OS=Arabidopsis thaliana OX=3702 GN=ABC1K7 PE=1 SV=1;;	PF03109.16	ABC1	ABC1 family
MTR_5g082070		major intrinsic protein (MIP) family transporter	GO:0055085;;GO:0016020;;GO:0016021;;GO:0005886;;GO:0015267	biological_process;;cellular_component;;cellular_component;;cellular_component;;molecular_function;;	BP:transmembrane transport;;CC:membrane;;CC:integral component of membrane;;CC:plasma membrane;;MF:channel activity;;	K09872	PIP	------	------	COG0580	G:Carbohydrate transport and metabolism	XP_003616586.1	probable aquaporin PIP-type 7a [Medicago truncatula]	sp|P25794|PIP2_PEA;;	Probable aquaporin PIP-type 7a OS=Pisum sativum OX=3888 GN=TRG-31 PE=2 SV=2;;	PF00230.20	MIP	Major intrinsic protein
MTR_5g081630		transmembrane amino acid transporter family protein	GO:0003333;;GO:0016021;;GO:0016020;;GO:0005886;;GO:0015171	biological_process;;cellular_component;;cellular_component;;cellular_component;;molecular_function;;	BP:amino acid transmembrane transport;;CC:integral component of membrane;;CC:membrane;;CC:plasma membrane;;MF:amino acid transmembrane transporter activity;;	------	------	------	------	COG0814	E:Amino acid transport and metabolism	GAU33996.1	hypothetical protein TSUD_212570, partial [Trifolium subterraneum]	sp|P92961|PROT1_ARATH;;	Proline transporter 1 OS=Arabidopsis thaliana OX=3702 GN=PROT1 PE=1 SV=1;;	PF01490.18	Aa_trans	Transmembrane amino acid transporter protein
MTR_4g109720		ABC transporter B family protein	GO:0055085;;GO:0016021;;GO:0016020;;GO:0042626;;GO:0099131;;GO:0015440;;GO:0000166;;GO:0016887;;GO:0005524	biological_process;;cellular_component;;cellular_component;;molecular_function;;deleted;;molecular_function;;molecular_function;;molecular_function;;molecular_function;;	BP:transmembrane transport;;CC:integral component of membrane;;CC:membrane;;MF:ATPase activity, coupled to transmembrane movement of substances;;MF:old GO;;MF:peptide-transporting ATPase activity;;MF:nucleotide binding;;MF:ATPase activity;;MF:ATP binding;;	------	------	------	------	COG1132	V:Defense mechanisms	XP_013458010.1	ABC transporter B family member 25 [Medicago truncatula]	sp|Q9FNU2|AB25B_ORYSJ;;	ABC transporter B family member 25 OS=Oryza sativa subsp. japonica OX=39947 GN=ABCB25 PE=2 SV=1;;	PF00664.23;;PF00005.27;;PF02463.19;;PF00004.29	ABC_membrane;;ABC_tran;;SMC_N;;AAA	ABC transporter transmembrane region;;ABC transporter;;RecF/RecN/SMC N terminal domain;;ATPase family associated with various cellular activities
MTR_8g038880		peptide/nitrate transporter plant	GO:0006857;;GO:0055085;;GO:0016021;;GO:0016020;;GO:0005215;;GO:0015333;;GO:0022857;;GO:1904680;;GO:0035673	biological_process;;biological_process;;cellular_component;;cellular_component;;molecular_function;;molecular_function;;molecular_function;;molecular_function;;molecular_function;;	BP:oligopeptide transport;;BP:transmembrane transport;;CC:integral component of membrane;;CC:membrane;;MF:transporter activity;;MF:peptid;;MF:transmembrane transporter activity;;MF:peptide transmembrane transporter activity;;MF:oligopeptide transmembrane transporter activity;;	K14638	SLC15A3_4, PHT	------	------	COG3104	S:Function unknown	XP_003627833.1	protein NRT1/ PTR FAMILY 5.4 [Medicago truncatula]	sp|Q9M1I2|PTR46_ARATH;;	Protein NRT1/ PTR FAMILY 5.4 OS=Arabidopsis thaliana OX=3702 GN=NPF5.4 PE=2 SV=1;;	PF00854.21;;PF07690.16	PTR2;;MFS_1	POT family;;Major Facilitator Superfamily
MTR_1g074930		high affinity inorganic phosphate transporter	GO:0006817;;GO:0055085;;GO:0016021;;GO:0016020;;GO:0016787;;GO:0005315;;GO:0022857	biological_process;;biological_process;;cellular_component;;cellular_component;;molecular_function;;molecular_function;;molecular_function;;	BP:phosphate ion transport;;BP:transmembrane transport;;CC:integral component of membrane;;CC:membrane;;MF:hydrolase activity;;MF:inorganic phosphate transmembrane transporter activity;;MF:transmembrane transporter activity;;	K08176	PHO84	------	------	ENOG410ZVN7	G:Carbohydrate transport and metabolism	XP_003590758.1	probable inorganic phosphate transporter 1-3 [Medicago truncatula]	sp|Q96303|PHT14_ARATH;;	Inorganic phosphate transporter 1-4 OS=Arabidopsis thaliana OX=3702 GN=PHT1-4 PE=1 SV=1;;	PF00083.24;;PF07690.16;;PF06779.14	Sugar_tr;;MFS_1;;MFS_4	Sugar;;Major Facilitator Superfamily;;Uncharacterised MFS-type transporter YbfB
MTR_0549s0020		C4-dicarboxylate transporter/malic acid transporter	GO:0006873;;GO:0055085;;GO:0015698;;GO:0016021;;GO:0016020;;GO:0005623;;GO:0008308	biological_process;;biological_process;;biological_process;;cellular_component;;cellular_component;;cellular_component;;molecular_function;;	BP:cellular ion homeostasis;;BP:transmembrane transport;;BP:inorganic anion transport;;CC:integral component of membrane;;CC:membrane;;CC:cell;;MF:voltage-gated anion channel activity;;	------	------	------	------	ENOG4111I0D	P:Inorganic ion transport and metabolism	KEH15794.1	C4-dicarboxylate transporter/malic acid transporter [Medicago truncatula]	sp|Q9FLV9|SLAH3_ARATH;;	S-type anion channel SLAH3 OS=Arabidopsis thaliana OX=3702 GN=SLAH3 PE=1 SV=1;;	PF03595.17	SLAC1	Voltage-dependent anion channel
MTR_7g098370		drug resistance transporter-like ABC domain protein	GO:0016021;;GO:0016020;;GO:0000166;;GO:0008559;;GO:0016887;;GO:0005524;;GO:0015407	cellular_component;;cellular_component;;molecular_function;;molecular_function;;molecular_function;;molecular_function;;molecular_function;;	CC:integral component of membrane;;CC:membrane;;MF:nucleotide binding;;MF:xenobiotic-transporting ATPase activity;;MF:ATPase activity;;MF:ATP binding;;MF:monosaccharide-transporting ATPase activity;;	------	------	------	------	COG1131;;COG0842	V:Defense mechanisms;;	AES81585.2	drug resistance transporter-like ABC domain protein [Medicago truncatula]	sp|Q76CU2|PDR1_TOBAC;;	Pleiotropic drug resistance protein 1 OS=Nicotiana tabacum OX=4097 GN=PDR1 PE=2 SV=1;;	PF01061.24;;PF00005.27;;PF08370.11;;PF14510.6;;PF13304.6;;PF13481.6	ABC2_membrane;;ABC_tran;;PDR_assoc;;ABC_trans_N;;AAA_21;;AAA_25	ABC-2 type transporter;;ABC transporter;;Plant PDR ABC transporter associated;;ABC-transporter N-terminal;;AAA domain, putative AbiEii toxin, Type IV TA system;;AAA domain
MTR_1g082650		heavy-metal-associated domain protein	GO:0030001;;GO:0046872	biological_process;;molecular_function;;	BP:metal ion transport;;MF:metal ion binding;;	------	------	------	------	COG2608	S:Function unknown	XP_003591083.1	heavy metal-associated isoprenylated plant protein 34 [Medicago truncatula]	sp|Q9M8K5|HIP32_ARATH;;	Heavy metal-associated isoprenylated plant protein 32 OS=Arabidopsis thaliana OX=3702 GN=HIPP32 PE=2 SV=1;;	PF00403.26	HMA	Heavy-metal-associated domain
MTR_1g082660		nuclear transcription factor Y protein	GO:0055085;;GO:0005634;;GO:0016021;;GO:0046982	biological_process;;cellular_component;;cellular_component;;molecular_function;;	BP:transmembrane transport;;CC:nucleus;;CC:integral component of membrane;;MF:protein heterodimerization activity;;	K08066	NFYC	------	------	COG5208	K:Transcription	XP_003591084.1	nuclear transcription factor Y subunit C-3 [Medicago truncatula]	sp|Q9ZVL3|NFYC3_ARATH;;	Nuclear transcription factor Y subunit C-3 OS=Arabidopsis thaliana OX=3702 GN=NFYC3 PE=1 SV=1;;	PF00808.23;;PF00125.24	CBFD_NFYB_HMF;;Histone	Histone-like transcription factor;;Core histone H2A/H2B/H3/H4
MTR_7g011330		phosphate transporter PHO1-like protein	GO:0006817;;GO:0016036;;GO:0005794;;GO:0016020;;GO:0016021;;GO:0005802;;GO:0005886;;GO:0000822;;GO:0015114	biological_process;;biological_process;;cellular_component;;cellular_component;;cellular_component;;cellular_component;;cellular_component;;molecular_function;;molecular_function;;	BP:phosphate ion transport;;BP:cellular response to phosphate starvation;;CC:Golgi apparatus;;CC:membrane;;CC:integral component of membrane;;CC:trans-Golgi network;;CC:plasma membrane;;MF:inositol hexakisphosphate binding;;MF:phosphate ion transmembrane transporter activity;;	------	------	------	------	COG5409	T:Signal transduction mechanisms	XP_003621279.2	phosphate transporter PHO1 homolog 9 isoform X1 [Medicago truncatula]	sp|Q9LJW0|PHO19_ARATH;;	Phosphate transporter PHO1 homolog 9 OS=Arabidopsis thaliana OX=3702 GN=PHO1-H9 PE=2 SV=1;;	PF03124.14;;PF03105.19	EXS;;SPX	EXS family;;SPX domain
MTR_1g062130		cytosine/purine uracil thiamine allantoin permease	GO:0043100;;GO:0055085;;GO:0009526;;GO:0016020;;GO:0016021;;GO:0005886;;GO:0015205;;GO:0022857	biological_process;;biological_process;;cellular_component;;cellular_component;;cellular_component;;cellular_component;;molecular_function;;molecular_function;;	BP:pyrimidine nucleobase salvage;;BP:transmembrane transport;;CC:plastid envelope;;CC:membrane;;CC:integral component of membrane;;CC:plasma membrane;;MF:nucleobase transmembrane transporter activity;;MF:transmembrane transporter activity;;	K03457	TC.NCS1	------	------	COG1953;;COG1953	F:Nucleotide transport and metabolism;;H:Coenzyme transport and metabolism	XP_003590437.1	purine-uracil permease NCS1 [Medicago truncatula]	sp|Q9LZD0|NCS1_ARATH;;	Purine-uracil permease NCS1 OS=Arabidopsis thaliana OX=3702 GN=NCS1 PE=1 SV=1;;	PF02133.15	Transp_cyt_pur	Permease for cytosine/purines, uracil, thiamine, allantoin
MTR_0172s0020		maltose excess protein	GO:0016020;;GO:0009941;;GO:0016021;;GO:0005363	cellular_component;;cellular_component;;cellular_component;;molecular_function;;	CC:membrane;;CC:chloroplast envelope;;CC:integral component of membrane;;MF:maltose transmembrane transporter activity;;	------	------	------	------	ENOG410ZKZ6	U:Intracellular trafficking, secretion, and vesicular transport	XP_013442451.1	maltose excess protein 1, chloroplastic [Medicago truncatula]	sp|Q9LF50|MEX1_ARATH;;	Maltose excess protein 1, chloroplastic OS=Arabidopsis thaliana OX=3702 GN=MEX1 PE=2 SV=2;;	------	------	------
MTR_3g081690		ZIP zinc/iron transport family protein	GO:0006811;;GO:0055085;;GO:0030001;;GO:0071577;;GO:0016020;;GO:0005886;;GO:0016021;;GO:0005385;;GO:0046873	biological_process;;biological_process;;biological_process;;biological_process;;cellular_component;;cellular_component;;cellular_component;;molecular_function;;molecular_function;;	BP:ion transport;;BP:transmembrane transport;;BP:metal ion transport;;BP:zinc II ion transmembrane transport;;CC:membrane;;CC:plasma membrane;;CC:integral component of membrane;;MF:zinc ion transmembrane transporter activity;;MF:metal ion transmembrane transporter activity;;	K14709	SLC39A1_2_3, ZIP1_2_3	------	------	ENOG4111GP2	P:Inorganic ion transport and metabolism	KEH35211.1	ZIP zinc/iron transport family protein [Medicago truncatula]	sp|Q6L8G0|ZIP5_ORYSJ;;	Zinc transporter 5 OS=Oryza sativa subsp. japonica OX=39947 GN=ZIP5 PE=2 SV=1;;	PF02535.22	Zip	ZIP Zinc transporter
MTR_4g074050		magnesium transporter NIPA2-like protein	GO:1903830;;GO:0015693;;GO:0006811;;GO:0016021;;GO:0016020;;GO:0005886;;GO:0005768;;GO:0005769;;GO:0015095	biological_process;;biological_process;;biological_process;;cellular_component;;cellular_component;;cellular_component;;cellular_component;;cellular_component;;molecular_function;;	BP:magnesium ion transmembrane transport;;BP:magnesium ion transport;;BP:ion transport;;CC:integral component of membrane;;CC:membrane;;CC:plasma membrane;;CC:endosome;;CC:early endosome;;MF:magnesium ion transmembrane transporter activity;;	------	------	------	------	ENOG410XNR8	S:Function unknown	XP_013456503.1	probable magnesium transporter NIPA6 [Medicago truncatula]	sp|Q8GWX2|NIPA6_ARATH;;	Probable magnesium transporter NIPA6 OS=Arabidopsis thaliana OX=3702 GN=At2g21120 PE=2 SV=1;;	PF05653.14;;PF00892.20	Mg_trans_NIPA;;EamA	Magnesium transporter NIPA;;EamA-like transporter family
MTR_4g111860		ubiquitin carboxyl-terminal hydrolase	GO:0006511;;GO:0016579;;GO:0016020;;GO:0016787;;GO:0005249;;GO:0036459	biological_process;;biological_process;;cellular_component;;molecular_function;;molecular_function;;molecular_function;;	BP:ubiquitin-dependent protein catabolic process;;BP:protein deubiquitination;;CC:membrane;;MF:hydrolase activity;;MF:voltage-gated potassium channel activity;;MF:thiol-dependent ubiquitinyl hydrolase activity;;	K11855	USP36_42	------	------	ENOG410XQ92	O:Posttranslational modification, protein turnover, chaperones	AES91287.2	ubiquitin carboxyl-terminal hydrolase [Medicago truncatula]	sp|Q9FPS7|UBP20_ARATH;;	Ubiquitin carboxyl-terminal hydrolase 20 OS=Arabidopsis thaliana OX=3702 GN=UBP20 PE=2 SV=1;;	PF00443.29;;PF13423.6	UCH;;UCH_1	Ubiquitin carboxyl-terminal hydrolase;;Ubiquitin carboxyl-terminal hydrolase
MTR_3g058630		ZIP metal ion transporter family protein	GO:0030001;;GO:0055085;;GO:0016020;;GO:0016021;;GO:0046873	biological_process;;biological_process;;cellular_component;;cellular_component;;molecular_function;;	BP:metal ion transport;;BP:transmembrane transport;;CC:membrane;;CC:integral component of membrane;;MF:metal ion transmembrane transporter activity;;	K14709	SLC39A1_2_3, ZIP1_2_3	------	------	ENOG4111GP2	J:Translation, ribosomal structure and biogenesis	XP_013460015.1	zinc transporter 11 [Medicago truncatula]	sp|Q94EG9|ZIP11_ARATH;;	Zinc transporter 11 OS=Arabidopsis thaliana OX=3702 GN=ZIP11 PE=2 SV=1;;	PF02535.22	Zip	ZIP Zinc transporter
MTR_5g042420		NAD(P)H dehydrogenase	GO:0070838;;GO:0030003;;GO:0010027;;GO:0006979;;GO:0009535;;GO:0016021;;GO:0009507	biological_process;;biological_process;;biological_process;;biological_process;;cellular_component;;cellular_component;;cellular_component;;	BP:divalent metal ion transport;;BP:cellular cation homeostasis;;BP:thylakoid membrane organization;;BP:response to oxidative stress;;CC:chloroplast thylakoid membrane;;CC:integral component of membrane;;CC:chloroplast;;	------	------	------	------	ENOG41127XZ	S:Function unknown	XP_003613903.1	photosynthetic NDH subunit of subcomplex B 5, chloroplastic [Medicago truncatula]	sp|Q9FG89|PNSB5_ARATH;;	Photosynthetic NDH subunit of subcomplex B 5, chloroplastic OS=Arabidopsis thaliana OX=3702 GN=PNSB5 PE=2 SV=1;;	------	------	------
MTR_3g017440		reactive oxygen species modulator 1	GO:0030150;;GO:0045039;;GO:0016021;;GO:0016020;;GO:0005739;;GO:0005744	biological_process;;biological_process;;cellular_component;;cellular_component;;cellular_component;;cellular_component;;	BP:protein import into mitochondrial matrix;;BP:protein import into mitochondrial inner membrane;;CC:integral component of membrane;;CC:membrane;;CC:mitochondrion;;CC:mitochondrial inner membrane presequence translocase complex;;	------	------	------	------	ENOG411279J	S:Function unknown	XP_003598620.2	uncharacterized protein LOC11430724 [Medicago truncatula]	------	------	PF10247.9;;PF13488.6	Romo1;;Gly-zipper_Omp	Reactive mitochondrial oxygen species modulator 1;;Glycine zipper
MTR_8g013810		cation transport ATPase	GO:0072511;;GO:0099132;;GO:0070588;;GO:0009624;;GO:0006882;;GO:0016021;;GO:0016020;;GO:0016787;;GO:0005388;;GO:0005524	biological_process;;deleted;;biological_process;;biological_process;;biological_process;;cellular_component;;cellular_component;;molecular_function;;molecular_function;;molecular_function;;	BP:divalent inorganic cation transport;;BP:old GO;;BP:calcium ion transmembrane transport;;BP:response to nematode;;BP:cellular zinc ion homeostasis;;CC:integral component of membrane;;CC:membrane;;MF:hydrolase activity;;MF:calcium-transporting ATPase activity;;MF:ATP binding;;	K01537	E3.6.3.8	------	------	ENOG410XNNC	P:Inorganic ion transport and metabolism	AET01464.2	cation transport ATPase [Medicago truncatula]	sp|Q9LIK7|ACA13_ARATH;;	Putative calcium-transporting ATPase 13, plasma membrane-type OS=Arabidopsis thaliana OX=3702 GN=ACA13 PE=3 SV=1;;	PF00122.20;;PF00690.26;;PF10329.9	E1-E2_ATPase;;Cation_ATPase_N;;DUF2417	E1-E2 ATPase;;Cation transporter/ATPase, N-terminus;;Region of unknown function
MTR_8g078170		PPR containing plant-like protein	GO:0051560;;GO:0016020;;GO:0016021;;GO:0005739;;GO:0015292	biological_process;;cellular_component;;cellular_component;;cellular_component;;molecular_function;;	BP:mitochondrial calcium ion homeostasis;;CC:membrane;;CC:integral component of membrane;;CC:mitochondrion;;MF:uniporter activity;;	K20858	MCU	map04218	Cellular senescence	ENOG410Y3YU	S:Function unknown	XP_003629496.1	calcium uniporter protein 2, mitochondrial [Medicago truncatula]	sp|O64823|MCU2_ARATH;;	Calcium uniporter protein 2, mitochondrial OS=Arabidopsis thaliana OX=3702 GN=At2g23790 PE=2 SV=1;;	PF04678.13	MCU	Mitochondrial calcium uniporter
MTR_2g013310		polyol/monosaccharide transporter 1	GO:0008643;;GO:0055085;;GO:0016021;;GO:0016020;;GO:0005887;;GO:0005351;;GO:0005215;;GO:0022857	biological_process;;biological_process;;cellular_component;;cellular_component;;cellular_component;;molecular_function;;molecular_function;;molecular_function;;	BP:carbohydrate transport;;BP:transmembrane transport;;CC:integral component of membrane;;CC:membrane;;CC:integral component of plasma membrane;;MF:suga;;MF:transporter activity;;MF:transmembrane transporter activity;;	------	------	------	------	ENOG410XNQK	G:Carbohydrate transport and metabolism	XP_003593550.1	probable polyol transporter 4 isoform X1 [Medicago truncatula]	sp|Q0WUU6|PLT4_ARATH;;	Probable polyol transporter 4 OS=Arabidopsis thaliana OX=3702 GN=PLT4 PE=2 SV=1;;	PF00083.24;;PF07690.16	Sugar_tr;;MFS_1	Sugar;;Major Facilitator Superfamily
MTR_6g015775		disease resistance protein (TIR-NBS-LRR class)	GO:0030001;;GO:0007165;;GO:0016787;;GO:0005515;;GO:0043531;;GO:0003677;;GO:0046872	biological_process;;biological_process;;molecular_function;;molecular_function;;molecular_function;;molecular_function;;molecular_function;;	BP:metal ion transport;;BP:signal transduction;;MF:hydrolase activity;;MF:protein binding;;MF:ADP binding;;MF:DNA binding;;MF:metal ion binding;;	------	------	------	------	ENOG4112BMQ;;ENOG4111VMD	S:Function unknown;;	XP_013451082.1	TMV resistance protein N isoform X2 [Medicago truncatula]	sp|Q40392|TMVRN_NICGU;;	TMV resistance protein N OS=Nicotiana glutinosa OX=35889 GN=N PE=1 SV=1;;	PF01582.20;;PF00931.22;;PF13676.6;;PF13855.6;;PF12799.7;;PF08937.11	TIR;;NB-ARC;;TIR_2;;LRR_8;;LRR_4;;DUF1863	TIR domain;;NB-ARC domain;;TIR domain;;Leucine rich repeat;;Leucine Rich repeats;;MTH538 TIR-like domain
MTR_5g030910		white-brown-complex ABC transporter family protein	GO:0003333;;GO:0055085;;GO:0016021;;GO:0016020;;GO:0005886;;GO:0015426;;GO:0016787;;GO:0042626;;GO:0000166;;GO:0016887;;GO:0005524	biological_process;;biological_process;;cellular_component;;cellular_component;;cellular_component;;molecular_function;;molecular_function;;molecular_function;;molecular_function;;molecular_function;;molecular_function;;	BP:amino acid transmembrane transport;;BP:transmembrane transport;;CC:integral component of membrane;;CC:membrane;;CC:plasma membrane;;MF:polar-amino acid-transporting ATPase activity;;MF:hydrolase activity;;MF:ATPase activity, coupled to transmembrane movement of substances;;MF:nucleotide binding;;MF:ATPase activity;;MF:ATP binding;;	------	------	------	------	COG1131	S:Function unknown	XP_003612949.1	ABC transporter G family member 17 [Medicago truncatula]	sp|Q9FNB5|AB6G_ARATH;;	ABC transporter G family member 6 OS=Arabidopsis thaliana OX=3702 GN=ABCG6 PE=2 SV=1;;	PF01061.24;;PF00005.27;;PF13555.6;;PF12698.7;;PF13481.6	ABC2_membrane;;ABC_tran;;AAA_29;;ABC2_membrane_3;;AAA_25	ABC-2 type transporter;;ABC transporter;;P-loop containing region of AAA domain;;ABC-2 family transporter protein;;AAA domain
MTR_5g088730		tyrosine-specific transporter, putative	GO:0003333;;GO:0016020;;GO:0009706;;GO:0005887;;GO:0016021;;GO:0015173	biological_process;;cellular_component;;cellular_component;;cellular_component;;cellular_component;;molecular_function;;	BP:amino acid transmembrane transport;;CC:membrane;;CC:chloroplast inner membrane;;CC:integral component of plasma membrane;;CC:integral component of membrane;;MF:aromatic amino acid transmembrane transporter activity;;	K03834	tyrP	------	------	COG0814	O:Posttranslational modification, protein turnover, chaperones	XP_003617181.2	uncharacterized protein LOC11441955 [Medicago truncatula]	sp|P0AAD4|TYRP_ECOLI;;	Tyrosine-specific transport protein OS=Escherichia coli;;	PF03222.13	Trp_Tyr_perm	Tryptophan/tyrosine permease family
MTR_5g082620		phosphatidylinositol-specific phospholipase C	GO:0006629;;GO:0051209;;GO:0007165;;GO:0032959;;GO:0035556;;GO:0016042;;GO:0048015;;GO:0005622;;GO:0005886;;GO:0016787;;GO:0004435;;GO:0008081	biological_process;;biological_process;;biological_process;;biological_process;;biological_process;;biological_process;;biological_process;;cellular_component;;cellular_component;;molecular_function;;molecular_function;;molecular_function;;	BP:lipid metabolic process;;BP:release of sequestered calcium ion into cytosol;;BP:signal transduction;;BP:inositol trisphosphate biosynthetic process;;BP:intracellular signal transduction;;BP:lipid catabolic process;;BP:phosphatidylinositol-mediated signaling;;CC:intracellular;;CC:plasma membrane;;MF:hydrolase activity;;MF:phosphatidylinositol phospholipase C activity;;MF:phosphoric diester hydr…	K05857	PLCD	map04070;;map04933;;map00562	Phosphatidylinositol signaling system;;AGE-RAGE signaling pathway in diabetic complications;;Inositol phosphate metabolism	ENOG410XPSW	S:Function unknown	XP_003616636.1	phosphoinositide phospholipase C 2 [Medicago truncatula]	sp|Q39033|PLCD2_ARATH;;	Phosphoinositide phospholipase C 2 OS=Arabidopsis thaliana OX=3702 GN=PLC2 PE=1 SV=1;;	PF00388.19;;PF00387.19;;PF00168.30;;PF09279.11	PI-PLC-X;;PI-PLC-Y;;C2;;EF-hand_like	Phosphatidylinositol-specific phospholipase C, X domain;;Phosphatidylinositol-specific phospholipase C, Y domain;;C2 domain;;Phosphoinositide-specific phospholipase C, efhand-like
MTR_1g086080		ABC transporter B family protein	GO:0055085;;GO:0016021;;GO:0016020;;GO:0005886;;GO:0016787;;GO:0042626;;GO:0099131;;GO:0000166;;GO:0008559;;GO:0016887;;GO:0005524	biological_process;;cellular_component;;cellular_component;;cellular_component;;molecular_function;;molecular_function;;deleted;;molecular_function;;molecular_function;;molecular_function;;molecular_function;;	BP:transmembrane transport;;CC:integral component of membrane;;CC:membrane;;CC:plasma membrane;;MF:hydrolase activity;;MF:ATPase activity, coupled to transmembrane movement of substances;;MF:old GO;;MF:nucleotide binding;;MF:xenobiotic-transporting ATPase activity;;MF:ATPase activity;;MF:ATP binding;;	K05658	ABCB1, CD243	map02010;;map05226	ABC transporters;;Gastric cancer	COG1132	M:Cell wall/membrane/envelope biogenesis	XP_003591310.1	ABC transporter B family member 21 [Medicago truncatula]	sp|O80725|AB4B_ARATH;;	ABC transporter B family member 4 OS=Arabidopsis thaliana OX=3702 GN=ABCB4 PE=1 SV=1;;	PF00664.23;;PF00005.27;;PF02463.19;;PF13555.6;;PF13191.6;;PF03193.16;;PF09818.9	ABC_membrane;;ABC_tran;;SMC_N;;AAA_29;;AAA_16;;RsgA_GTPase;;ABC_ATPase	ABC transporter transmembrane region;;ABC transporter;;RecF/RecN/SMC N terminal domain;;P-loop containing region of AAA domain;;AAA ATPase domain;;RsgA GTPase;;Predicted ATPase of the ABC class
MTR_0212s0020		cytochrome C biogenesis Fn protein	GO:0015886;;GO:0017004;;GO:0016020;;GO:0005739;;GO:0016021;;GO:0015232;;GO:0020037	biological_process;;biological_process;;cellular_component;;cellular_component;;cellular_component;;molecular_function;;molecular_function;;	BP:heme transport;;BP:cytochrome complex assembly;;CC:membrane;;CC:mitochondrion;;CC:integral component of membrane;;MF:heme transporter activity;;MF:heme binding;;	------	------	------	------	COG1138	O:Posttranslational modification, protein turnover, chaperones	KEH16362.1	cytochrome C biogenesis Fn protein, partial [Medicago truncatula]	sp|Q04647|CCBS_DAUCA;;	Probable cytochrome c biosynthesis protein OS=Daucus carota OX=4039 PE=2 SV=1;;	PF01578.20	Cytochrom_C_asm	Cytochrome C assembly protein
MTR_0053s0030		ubiquinone biosynthesis protein UbiB	GO:0006468;;GO:0099132;;GO:0070574;;GO:0015434;;GO:0016787;;GO:0004672;;GO:0005524	biological_process;;deleted;;biological_process;;molecular_function;;molecular_function;;molecular_function;;molecular_function;;	BP:protein phosphorylation;;BP:old GO;;BP:cadmium ion transmembrane transport;;MF:cadmium-transporting ATPase activity;;MF:hydrolase activity;;MF:protein kinase activity;;MF:ATP binding;;	K08869	ADCK, ABC1	------	------	COG0661	S:Function unknown	XP_013442989.1	protein ACTIVITY OF BC1 COMPLEX KINASE 3, chloroplastic [Medicago truncatula]	sp|Q9MA15|AB1K3_ARATH;;	Protein ACTIVITY OF BC1 COMPLEX KINASE 3, chloroplastic OS=Arabidopsis thaliana OX=3702 GN=ABC1K3 PE=1 SV=1;;	PF03109.16;;PF01636.23	ABC1;;APH	ABC1 family;;Phosphotransferase enzyme family
MTR_1588s0010		ATP synthase F1, gamma subunit	GO:0015986;;GO:0099132;;GO:0006754;;GO:0045261;;GO:0000275;;GO:0009535;;GO:0016787;;GO:0046933	biological_process;;deleted;;biological_process;;cellular_component;;cellular_component;;cellular_component;;molecular_function;;molecular_function;;	BP:ATP synthesis coupled proton transport;;BP:old GO;;BP:ATP biosynthetic process;;CC:proton-transporting ATP synthase complex, catalytic core;;CC:mitochondrial proton-transporting ATP synthase complex, catalytic core;;CC:chloroplast thylakoid membrane;;MF:hydrolase activity;;MF:proton-transporting ATP synthase activity, rotational mechanism;;	K02115	ATPF1G, atpG	map00195;;map00190	Photosynthesis;;Oxidative phosphorylation	COG0224;;ENOG410XTBX	C:Energy production and conversion;;S:Function unknown	KEH15255.1	ATP synthase F1, gamma subunit, partial [Medicago truncatula]	sp|P28552|ATPG_PEA;;	ATP synthase gamma chain, chloroplastic OS=Pisum sativum OX=3888 GN=ATPC PE=2 SV=1;;	PF00231.19	ATP-synt	ATP synthase
MTR_6g015720		disease resistance protein (TIR-NBS-LRR class)	GO:0030001;;GO:0007165;;GO:0016021;;GO:0005515;;GO:0043531;;GO:0003677;;GO:0046872	biological_process;;biological_process;;cellular_component;;molecular_function;;molecular_function;;molecular_function;;molecular_function;;	BP:metal ion transport;;BP:signal transduction;;CC:integral component of membrane;;MF:protein binding;;MF:ADP binding;;MF:DNA binding;;MF:metal ion binding;;	------	------	------	------	ENOG4112BMQ;;ENOG4111VMD	S:Function unknown;;	KEH25114.1	disease resistance protein (TIR-NBS-LRR class) [Medicago truncatula]	sp|Q40392|TMVRN_NICGU;;	TMV resistance protein N OS=Nicotiana glutinosa OX=35889 GN=N PE=1 SV=1;;	PF01582.20;;PF00931.22;;PF13676.6;;PF13855.6;;PF12799.7	TIR;;NB-ARC;;TIR_2;;LRR_8;;LRR_4	TIR domain;;NB-ARC domain;;TIR domain;;Leucine rich repeat;;Leucine Rich repeats
MTR_1g108770		F0F1-type ATP synthase, beta subunit	GO:0015986;;GO:0099132;;GO:0046034;;GO:1902600;;GO:0042776;;GO:0006754;;GO:0045261;;GO:0000275;;GO:0005753;;GO:0016787;;GO:0046933;;GO:0000166;;GO:0016887;;GO:0005524	biological_process;;deleted;;biological_process;;biological_process;;biological_process;;biological_process;;cellular_component;;cellular_component;;cellular_component;;molecular_function;;molecular_function;;molecular_function;;molecular_function;;molecular_function;;	BP:ATP synthesis coupled proton transport;;BP:old GO;;BP:ATP metabolic process;;BP:hydrogen ion transmembrane transport;;BP:mitochondrial ATP synthesis coupled proton transport;;BP:ATP biosynthetic process;;CC:proton-transporting ATP synthase complex, catalytic core;;CC:mitochondrial proton-transporting ATP synthase complex, catalytic core;;CC:mitochondrial proton-transporting ATP synthase comple…	K02133	ATPeF1B, ATP5B, ATP2	map00190;;map04714	Oxidative phosphorylation;;Thermogenesis	COG0055	C:Energy production and conversion	XP_003592582.2	ATP synthase subunit beta, mitochondrial [Medicago truncatula]	sp|Q01859|ATPBM_ORYSJ;;	ATP synthase subunit beta, mitochondrial OS=Oryza sativa subsp. japonica OX=39947 GN=ATPB PE=1 SV=2;;	PF00006.25;;PF02874.23;;PF11421.8	ATP-synt_ab;;ATP-synt_ab_N;;Synthase_beta	ATP synthase alpha/beta family, nucleotide-binding domain;;ATP synthase alpha/beta family, beta-barrel domain;;ATP synthase F1 beta subunit
MTR_5g094130		ATPase, V0 complex, subunit E	GO:0015991;;GO:0055085;;GO:0016021;;GO:0016020;;GO:0033179;;GO:0015078	biological_process;;biological_process;;cellular_component;;cellular_component;;cellular_component;;molecular_function;;	BP:ATP hydrolysis coupled proton transport;;BP:transmembrane transport;;CC:integral component of membrane;;CC:membrane;;CC:proton-transporting V-type ATPase, V0 domain;;MF:hydrogen ion transmembrane transporter activity;;	K02153	ATPeV0E, ATP6H	map04145;;map05165;;map00190	Phagosome;;Human papillomavirus infection;;Oxidative phosphorylation	ENOG41121M0	C:Energy production and conversion	XP_003617667.1	V-type proton ATPase subunit e2 [Medicago truncatula]	sp|Q9SZ13|VA0E2_ARATH;;	V-type proton ATPase subunit e2 OS=Arabidopsis thaliana OX=3702 GN=VHA-e2 PE=3 SV=1;;	PF05493.13	ATP_synt_H	ATP synthase subunit H
MTR_1g116650		sugar porter (SP) family MFS transporter	GO:0008643;;GO:0055085;;GO:0016021;;GO:0016020;;GO:0005215;;GO:0022857	biological_process;;biological_process;;cellular_component;;cellular_component;;molecular_function;;molecular_function;;	BP:carbohydrate transport;;BP:transmembrane transport;;CC:integral component of membrane;;CC:membrane;;MF:transporter activity;;MF:transmembrane transporter activity;;	K08150	SLC2A13, ITR	------	------	ENOG410XNQK	G:Carbohydrate transport and metabolism	AES63093.1	sugar porter (SP) family MFS transporter [Medicago truncatula]	sp|Q8VZR6|INT1_ARATH;;	Inositol transporter 1 OS=Arabidopsis thaliana OX=3702 GN=INT1 PE=1 SV=1;;	PF00083.24;;PF07690.16;;PF06609.13;;PF13347.6;;PF12832.7	Sugar_tr;;MFS_1;;TRI12;;MFS_2;;MFS_1_like	Sugar;;Major Facilitator Superfamily;;Fungal trichothecene efflux pump;;MFS/sugar transport protein;;MFS_1 like family
MTR_3g498715		cation/H+ exchanger 3	GO:1902600;;GO:0006885;;GO:0006812;;GO:0055085;;GO:0016021;;GO:0016020;;GO:0012505;;GO:0015299	biological_process;;biological_process;;biological_process;;biological_process;;cellular_component;;cellular_component;;cellular_component;;molecular_function;;	BP:hydrogen ion transmembrane transport;;BP:regulation of pH;;BP:cation transport;;BP:transmembrane transport;;CC:integral component of membrane;;CC:membrane;;CC:endomembrane system;;MF:solut;;	------	------	------	------	COG0475	P:Inorganic ion transport and metabolism	XP_013461652.1	cation/H(+) antiporter 4 [Medicago truncatula]	sp|Q9FYC1|CHX4_ARATH;;	Cation/;;	PF00999.21	Na_H_Exchanger	Sodium/hydrogen exchanger family
MTR_6g023065		transmembrane amino acid transporter family protein	GO:0003333;;GO:0016021;;GO:0016020;;GO:0005886;;GO:0015171	biological_process;;cellular_component;;cellular_component;;cellular_component;;molecular_function;;	BP:amino acid transmembrane transport;;CC:integral component of membrane;;CC:membrane;;CC:plasma membrane;;MF:amino acid transmembrane transporter activity;;	------	------	------	------	COG0814	E:Amino acid transport and metabolism	KEH25437.1	transmembrane amino acid transporter family protein [Medicago truncatula]	sp|Q9FKS8|LHT1_ARATH;;	Lysine histidine transporter 1 OS=Arabidopsis thaliana OX=3702 GN=LHT1 PE=1 SV=1;;	PF01490.18;;PF03222.13	Aa_trans;;Trp_Tyr_perm	Transmembrane amino acid transporter protein;;Tryptophan/tyrosine permease family
MTR_3g096310		GDP-mannose transporter GONST1	GO:0005794;;GO:0016021;;GO:0016020;;GO:0015297;;GO:0005458;;GO:0022857	cellular_component;;cellular_component;;cellular_component;;molecular_function;;molecular_function;;molecular_function;;	CC:Golgi apparatus;;CC:integral component of membrane;;CC:membrane;;MF:antiporter activity;;MF:GDP-mannose transmembrane transporter activity;;MF:transmembrane transporter activity;;	K15356	VRG4, GONST1	------	------	COG5070	U:Intracellular trafficking, secretion, and vesicular transport	XP_003602620.1	GDP-mannose transporter GONST1 isoform X1 [Medicago truncatula]	sp|Q941R4|GONS1_ARATH;;	GDP-mannose transporter GONST1 OS=Arabidopsis thaliana OX=3702 GN=GONST1 PE=1 SV=2;;	PF03151.16	TPT	Triose-phosphate Transporter family
MTR_3g056700		multidrug resistance protein ABC transporter family protein	GO:0055085;;GO:0016021;;GO:0016020;;GO:0042626;;GO:0099131;;GO:0000166;;GO:0008559;;GO:0016887;;GO:0005524	biological_process;;cellular_component;;cellular_component;;molecular_function;;deleted;;molecular_function;;molecular_function;;molecular_function;;molecular_function;;	BP:transmembrane transport;;CC:integral component of membrane;;CC:membrane;;MF:ATPase activity, coupled to transmembrane movement of substances;;MF:old GO;;MF:nucleotide binding;;MF:xenobiotic-transporting ATPase activity;;MF:ATPase activity;;MF:ATP binding;;	K05666	ABCC2	map02010	ABC transporters	COG1132	V:Defense mechanisms	XP_024635879.1	ABC transporter C family member 3 isoform X3 [Medicago truncatula]	sp|Q9LK64|AB3C_ARATH;;	ABC transporter C family member 3 OS=Arabidopsis thaliana OX=3702 GN=ABCC3 PE=1 SV=1;;	PF00005.27;;PF00664.23	ABC_tran;;ABC_membrane	ABC transporter;;ABC transporter transmembrane region
MTR_3g104310		NADH:ubiquinone oxidoreductase protein	GO:0051788;;GO:0080129;;GO:0015990;;GO:0032981;;GO:0009853;;GO:0009060;;GO:0055114;;GO:0005747;;GO:0046872;;GO:0051539;;GO:0008137;;GO:0051536;;GO:0048038;;GO:0016491	biological_process;;biological_process;;biological_process;;biological_process;;biological_process;;biological_process;;biological_process;;cellular_component;;molecular_function;;molecular_function;;molecular_function;;molecular_function;;molecular_function;;molecular_function;;	BP:response to misfolded protein;;BP:proteasome core complex assembly;;BP:electron transport coupled proton transport;;BP:mitochondrial respiratory chain complex I assembly;;BP:photorespiration;;BP:aerobic respiration;;BP:oxidation-reduction process;;CC:mitochondrial respiratory chain complex I;;MF:metal ion binding;;MF:4 iron, 4 sulfur cluster binding;;MF:NADH dehydrogenas;;MF:iron-sulfur cluste…	K03940	NDUFS7	map00190;;map04714	Oxidative phosphorylation;;Thermogenesis	COG0377	S:Function unknown	XP_003603142.1	NADH dehydrogenase [ubiquinone] iron-sulfur protein 7, mitochondrial [Medicago truncatula]	sp|Q42577|NDUS7_ARATH;;	NADH dehydrogenase [ubiquinone] iron-sulfur protein 7, mitochondrial OS=Arabidopsis thaliana OX=3702 GN=At5g11770 PE=1 SV=1;;	PF01058.22	Oxidored_q6	NADH ubiquinone oxidoreductase, 20 Kd subunit
MTR_6g015490		disease resistance protein (TIR-NBS-LRR class)	GO:0030001;;GO:0007165;;GO:0043531;;GO:0005515;;GO:0003677;;GO:0046872	biological_process;;biological_process;;molecular_function;;molecular_function;;molecular_function;;molecular_function;;	BP:metal ion transport;;BP:signal transduction;;MF:ADP binding;;MF:protein binding;;MF:DNA binding;;MF:metal ion binding;;	------	------	------	------	ENOG4112BMQ;;ENOG4111VMD	S:Function unknown;;	XP_013451043.1	TMV resistance protein N [Medicago truncatula]	sp|Q40392|TMVRN_NICGU;;	TMV resistance protein N OS=Nicotiana glutinosa OX=35889 GN=N PE=1 SV=1;;	PF01582.20;;PF00931.22;;PF13676.6;;PF00403.26;;PF13855.6	TIR;;NB-ARC;;TIR_2;;HMA;;LRR_8	TIR domain;;NB-ARC domain;;TIR domain;;Heavy-metal-associated domain;;Leucine rich repeat
MTR_3g104500		ADP/ATP carrier protein	GO:0055085;;GO:0048653;;GO:0016021;;GO:0016020;;GO:0005743;;GO:0005347;;GO:0022857;;GO:0005471	biological_process;;biological_process;;cellular_component;;cellular_component;;cellular_component;;molecular_function;;molecular_function;;molecular_function;;	BP:transmembrane transport;;BP:anther development;;CC:integral component of membrane;;CC:membrane;;CC:mitochondrial inner membrane;;MF:ATP transmembrane transporter activity;;MF:transmembrane transporter activity;;MF:AT;;	K05863	SLC25A4S, ANT	map04218;;map04217	Cellular senescence;;Necroptosis	ENOG410XNW0	O:Posttranslational modification, protein turnover, chaperones	XP_003603158.1	probable ADP,ATP carrier protein At5g56450 [Medicago truncatula]	sp|Q9FM86|ADT5_ARATH;;	Probable ADP,ATP carrier protein At5g56450 OS=Arabidopsis thaliana OX=3702 GN=At5g56450 PE=2 SV=1;;	PF00153.27	Mito_carr	Mitochondrial carrier protein
MTR_8g024240		heavy metal transporter MTP1	GO:0006812;;GO:0098655;;GO:0055085;;GO:0016021;;GO:0016020;;GO:0008324	biological_process;;biological_process;;biological_process;;cellular_component;;cellular_component;;molecular_function;;	BP:cation transport;;BP:cation transmembrane transport;;BP:transmembrane transport;;CC:integral component of membrane;;CC:membrane;;MF:cation transmembrane transporter activity;;	K14689	SLC30A2, ZNT2	------	------	COG1230	K:Transcription	XP_013444540.1	metal tolerance protein 1 isoform X2 [Medicago truncatula]	sp|Q9ZT63|MTP1_ARATH;;	Metal tolerance protein 1 OS=Arabidopsis thaliana OX=3702 GN=MTP1 PE=1 SV=2;;	PF01545.21	Cation_efflux	Cation efflux family
MTR_4g094060		white-brown-complex ABC transporter family protein	GO:0055085;;GO:0016021;;GO:0016020;;GO:0005886;;GO:0016787;;GO:0042626;;GO:0000166;;GO:0016887;;GO:0005524	biological_process;;cellular_component;;cellular_component;;cellular_component;;molecular_function;;molecular_function;;molecular_function;;molecular_function;;molecular_function;;	BP:transmembrane transport;;CC:integral component of membrane;;CC:membrane;;CC:plasma membrane;;MF:hydrolase activity;;MF:ATPase activity, coupled to transmembrane movement of substances;;MF:nucleotide binding;;MF:ATPase activity;;MF:ATP binding;;	------	------	------	------	COG1131;;COG0842	V:Defense mechanisms;;	XP_003608436.2	ABC transporter G family member 11 [Medicago truncatula]	sp|Q8RXN0|AB11G_ARATH;;	ABC transporter G family member 11 OS=Arabidopsis thaliana OX=3702 GN=ABCG11 PE=1 SV=1;;	PF01061.24;;PF00005.27;;PF03193.16;;PF03215.15;;PF13191.6;;PF13555.6	ABC2_membrane;;ABC_tran;;RsgA_GTPase;;Rad17;;AAA_16;;AAA_29	ABC-2 type transporter;;ABC transporter;;RsgA GTPase;;Rad17 P-loop domain;;AAA ATPase domain;;P-loop containing region of AAA domain
MTR_7g111580		POT family protein	GO:0055085;;GO:0016020;;GO:0016021;;GO:0022857	biological_process;;cellular_component;;cellular_component;;molecular_function;;	BP:transmembrane transport;;CC:membrane;;CC:integral component of membrane;;MF:transmembrane transporter activity;;	K14638	SLC15A3_4, PHT	------	------	COG3104	E:Amino acid transport and metabolism	AES82367.2	POT family protein [Medicago truncatula]	sp|Q9FM20|PTR54_ARATH;;	Protein NRT1/ PTR FAMILY 4.7 OS=Arabidopsis thaliana OX=3702 GN=NPF4.7 PE=2 SV=2;;	PF00854.21	PTR2	POT family
MTR_4g097800		cytochrome C oxidase	GO:0022900;;GO:1902600;;GO:0006123;;GO:0009060;;GO:0055114;;GO:0005751;;GO:0005743;;GO:0004129;;GO:0030234;;GO:0016491	biological_process;;biological_process;;biological_process;;biological_process;;biological_process;;cellular_component;;cellular_component;;molecular_function;;molecular_function;;molecular_function;;	BP:electron transport chain;;BP:hydrogen ion transmembrane transport;;BP:mitochondrial electron transport, cytochrome c to oxygen;;BP:aerobic respiration;;BP:oxidation-reduction process;;CC:mitochondrial respiratory chain complex IV;;CC:mitochondrial inner membrane;;MF:cytochrome-c oxidase activity;;MF:enzyme regulator activity;;MF:oxidoreductase activity;;	K02266	COX6A	map00190;;map04714	Oxidative phosphorylation;;Thermogenesis	ENOG411253X	O:Posttranslational modification, protein turnover, chaperones	XP_003608580.1	cytochrome c oxidase subunit 6a, mitochondrial [Medicago truncatula]	sp|Q9T070|COX6A_ARATH;;	Cytochrome c oxidase subunit 6a, mitochondrial OS=Arabidopsis thaliana OX=3702 GN=COX6A PE=3 SV=1;;	PF02046.15	COX6A	Cytochrome c oxidase subunit VIa
MTR_8g469150		porin/voltage-dependent anion-selective channel protein	GO:0098656;;GO:0015698;;GO:0055085;;GO:0005741;;GO:0008308	biological_process;;biological_process;;biological_process;;cellular_component;;molecular_function;;	BP:anion transmembrane transport;;BP:inorganic anion transport;;BP:transmembrane transport;;CC:mitochondrial outer membrane;;MF:voltage-gated anion channel activity;;	K15040	VDAC2	map04217;;map04979;;map04218	Necroptosis;;Cholesterol metabolism;;Cellular senescence	ENOG410ZBK1	S:Function unknown	KEH19833.1	porin/voltage-dependent anion-selective channel protein [Medicago truncatula]	sp|P42056|VDAC2_SOLTU;;	Mitochondrial outer membrane protein porin of 36 kDa OS=Solanum tuberosum OX=4113 PE=1 SV=2;;	PF01459.22	Porin_3	Eukaryotic porin
MTR_1g046620		ABC1/COQ8 Serine/Threonine kinase	GO:0006468;;GO:0099132;;GO:0016310;;GO:0070574;;GO:0015434;;GO:0016787;;GO:0016301;;GO:0004672;;GO:0005524	biological_process;;deleted;;biological_process;;biological_process;;molecular_function;;molecular_function;;molecular_function;;molecular_function;;molecular_function;;	BP:protein phosphorylation;;BP:old GO;;BP:phosphorylation;;BP:cadmium ion transmembrane transport;;MF:cadmium-transporting ATPase activity;;MF:hydrolase activity;;MF:kinase activity;;MF:protein kinase activity;;MF:ATP binding;;	K08869	ADCK, ABC1	------	------	COG0661	S:Function unknown	XP_013467168.1	uncharacterized protein LOC25483068 [Medicago truncatula]	sp|Q55680|Y005_SYNY3;;	Uncharacterized protein sll0005 OS=Synechocystis sp.;;	PF03109.16;;PF01636.23;;PF00069.25	ABC1;;APH;;Pkinase	ABC1 family;;Phosphotransferase enzyme family;;Protein kinase domain
MTR_4g415300		major intrinsic protein (MIP) family transporter	GO:0055085;;GO:0016020;;GO:0016021;;GO:0015267	biological_process;;cellular_component;;cellular_component;;molecular_function;;	BP:transmembrane transport;;CC:membrane;;CC:integral component of membrane;;MF:channel activity;;	K09872	PIP	------	------	COG0580	I:Lipid transport and metabolism	XP_013455159.1	probable aquaporin PIP1-4 [Medicago truncatula]	sp|Q39196|PIP14_ARATH;;	Probable aquaporin PIP1-4 OS=Arabidopsis thaliana OX=3702 GN=PIP1.4 PE=1 SV=1;;	PF00230.20	MIP	Major intrinsic protein
MTR_5g010420		heavy metal P-type ATPase	GO:0030001;;GO:0006812;;GO:0010273;;GO:0016021;;GO:0016020;;GO:0016787;;GO:0004008;;GO:0046872;;GO:0099132;;GO:0000166;;GO:0019829;;GO:0005507;;GO:0005524	biological_process;;biological_process;;biological_process;;cellular_component;;cellular_component;;molecular_function;;molecular_function;;molecular_function;;deleted;;molecular_function;;molecular_function;;molecular_function;;molecular_function;;	BP:metal ion transport;;BP:cation transport;;BP:detoxification of copper ion;;CC:integral component of membrane;;CC:membrane;;MF:hydrolase activity;;MF:copper-exporting ATPase activity;;MF:metal ion binding;;MF:old GO;;MF:nucleotide binding;;MF:cation-transporting ATPase activity;;MF:copper ion binding;;MF:ATP binding;;	K17686	copA, ATP7	map04016	MAPK signaling pathway - plant	COG2217	P:Inorganic ion transport and metabolism	XP_003611105.2	probable copper-transporting ATPase HMA5 [Medicago truncatula]	sp|Q9SH30|HMA5_ARATH;;	Probable copper-transporting ATPase HMA5 OS=Arabidopsis thaliana OX=3702 GN=HMA5 PE=1 SV=2;;	PF00122.20;;PF00702.26;;PF00403.26;;PF08282.12	E1-E2_ATPase;;Hydrolase;;HMA;;Hydrolase_3	E1-E2 ATPase;;haloacid dehalogenase-like hydrolase;;Heavy-metal-associated domain;;haloacid dehalogenase-like hydrolase
MTR_0004s0650		glycerol-3-phosphate transporter	GO:0015794;;GO:0055085;;GO:0016021;;GO:0016020;;GO:0016787;;GO:0015430;;GO:0022857	biological_process;;biological_process;;cellular_component;;cellular_component;;molecular_function;;molecular_function;;molecular_function;;	BP:glycerol-3-phosphate transport;;BP:transmembrane transport;;CC:integral component of membrane;;CC:membrane;;MF:hydrolase activity;;MF:glycerol-3-phosphate-transporting ATPase activity;;MF:transmembrane transporter activity;;	K13783	SLC37A1_2	------	------	COG2271	S:Function unknown	XP_013443616.1	putative glycerol-3-phosphate transporter 1 [Medicago truncatula]	sp|Q9C5L3|GLPT1_ARATH;;	Putative glycerol-3-phosphate transporter 1 OS=Arabidopsis thaliana OX=3702 GN=At3g47420 PE=2 SV=1;;	PF07690.16	MFS_1	Major Facilitator Superfamily
MTR_1g079760		ammonium transporter 1 protein	GO:0015843;;GO:0015696;;GO:0009624;;GO:0072488;;GO:0016020;;GO:0000178;;GO:0016021;;GO:0005886;;GO:0008519;;GO:0003723	biological_process;;biological_process;;biological_process;;biological_process;;cellular_component;;cellular_component;;cellular_component;;cellular_component;;molecular_function;;molecular_function;;	BP:methylammonium transport;;BP:ammonium transport;;BP:response to nematode;;BP:ammonium transmembrane transport;;CC:membrane;;CC:exosom;;CC:integral component of membrane;;CC:plasma membrane;;MF:ammonium transmembrane transporter activity;;MF:RNA binding;;	K07573;K03320	CSL4, EXOSC1;amt, AMT, MEP	map03018	RNA degradation	COG0004	K:Transcription	XP_003590923.2	ammonium transporter 1 member 2 [Medicago truncatula]	sp|O04161|AMT12_SOLLC;;	Ammonium transporter 1 member 2 OS=Solanum lycopersicum OX=4081 GN=AMT1-2 PE=2 SV=1;;	PF00909.21	Ammonium_transp	Ammonium Transporter Family
MTR_3g092095		cytochrome b5-like heme/steroid-binding domain protein	GO:0055085;;GO:0016021;;GO:0016020;;GO:0020037;;GO:0046872;;GO:0016491	biological_process;;cellular_component;;cellular_component;;molecular_function;;molecular_function;;molecular_function;;	BP:transmembrane transport;;CC:integral component of membrane;;CC:membrane;;MF:heme binding;;MF:metal ion binding;;MF:oxidoreductase activity;;	------	------	------	------	COG5274	S:Function unknown	XP_013461441.1	cytochrome b5 [Medicago truncatula]	sp|Q42342|CYB5E_ARATH;;	Cytochrome b5 isoform E OS=Arabidopsis thaliana OX=3702 GN=CYTB5-E PE=1 SV=2;;	PF00173.28	Cyt-b5	Cytochrome b5-like Heme/Steroid binding domain
MTR_6g037640		import inner membrane translocase subunit tim16-like protein	GO:0030150;;GO:0016021;;GO:0005744	biological_process;;cellular_component;;cellular_component;;	BP:protein import into mitochondrial matrix;;CC:integral component of membrane;;CC:mitochondrial inner membrane presequence translocase complex;;	K17805	PAM16, TIM16	------	------	ENOG411286G	U:Intracellular trafficking, secretion, and vesicular transport	XP_013451887.1	mitochondrial import inner membrane translocase subunit PAM16 like 2 [Medicago truncatula]	sp|Q93VV9|TM16B_ARATH;;	Mitochondrial import inner membrane translocase subunit PAM16 like 2 OS=Arabidopsis thaliana OX=3702 GN=PAM16L2 PE=2 SV=1;;	PF03656.13	Pam16	Pam16
MTR_2g073080		bile acid:Na+ symporter family protein	GO:0016021;;GO:0016020;;GO:0008508	cellular_component;;cellular_component;;molecular_function;;	CC:integral component of membrane;;CC:membrane;;MF:bile aci;;	K03453	TC.BASS	------	------	COG0385	S:Function unknown	KEH38535.1	bile acid:Na+ symporter family protein [Medicago truncatula]	sp|Q93YR2|BASS1_ARATH;;	Probable sodium/metabolite cotransporter BASS1, chloroplastic OS=Arabidopsis thaliana OX=3702 GN=BASS1 PE=2 SV=1;;	PF01758.16	SBF	Sodium Bile acid symporter family
MTR_5g034910		nodulin MtN21/EamA-like transporter family protein	GO:0055085;;GO:0016020;;GO:0016021;;GO:0005886;;GO:0022857	biological_process;;cellular_component;;cellular_component;;cellular_component;;molecular_function;;	BP:transmembrane transport;;CC:membrane;;CC:integral component of membrane;;CC:plasma membrane;;MF:transmembrane transporter activity;;	------	------	------	------	ENOG41114N0	S:Function unknown	XP_003613285.1	WAT1-related protein At5g40240 [Medicago truncatula]	sp|Q9FL08|WTR42_ARATH;;	WAT1-related protein At5g40240 OS=Arabidopsis thaliana OX=3702 GN=At5g40240 PE=2 SV=1;;	PF00892.20	EamA	EamA-like transporter family
MTR_7g005930		peptide/nitrate transporter	GO:0010167;;GO:0055085;;GO:0016021;;GO:0016020;;GO:0005886;;GO:0022857;;GO:0015112	biological_process;;biological_process;;cellular_component;;cellular_component;;cellular_component;;molecular_function;;molecular_function;;	BP:response to nitrate;;BP:transmembrane transport;;CC:integral component of membrane;;CC:membrane;;CC:plasma membrane;;MF:transmembrane transporter activity;;MF:nitrate transmembrane transporter activity;;	K14638	SLC15A3_4, PHT	------	------	COG3104	E:Amino acid transport and metabolism	ABN09773.1	TGF-beta receptor, type I/II extracellular region [Medicago truncatula]	sp|Q3E9B5|PTR51_ARATH;;	Protein NRT1/ PTR FAMILY 7.1 OS=Arabidopsis thaliana OX=3702 GN=NPF7.1 PE=2 SV=1;;	PF00854.21	PTR2	POT family
MTR_7g079110		heavy metal transport/detoxification superfamily protein	GO:0030001;;GO:0046872	biological_process;;molecular_function;;	BP:metal ion transport;;MF:metal ion binding;;	------	------	------	------	COG2608	O:Posttranslational modification, protein turnover, chaperones	XP_003624087.1	heavy metal-associated isoprenylated plant protein 39 [Medicago truncatula]	sp|O03982|HIP39_ARATH;;	Heavy metal-associated isoprenylated plant protein 39 OS=Arabidopsis thaliana OX=3702 GN=HIPP39 PE=2 SV=1;;	PF00403.26;;PF02724.14;;PF06459.12	HMA;;CDC45;;RR_TM4-6	Heavy-metal-associated domain;;CDC45-like protein;;Ryanodine Receptor TM 4-6
MTR_1g112340		pyruvate carrier-like protein	GO:0006850;;GO:0016021;;GO:0005739;;GO:0031305;;GO:0005743;;GO:0050833	biological_process;;cellular_component;;cellular_component;;cellular_component;;cellular_component;;molecular_function;;	BP:mitochondrial pyruvate transport;;CC:integral component of membrane;;CC:mitochondrion;;CC:integral component of mitochondrial inner membrane;;CC:mitochondrial inner membrane;;MF:pyruvate transmembrane transporter activity;;	------	------	------	------	ENOG4111TU9	S:Function unknown	XP_013470302.1	mitochondrial pyruvate carrier 1 [Medicago truncatula]	sp|Q949R9|MPC1_ARATH;;	Mitochondrial pyruvate carrier 1 OS=Arabidopsis thaliana OX=3702 GN=MPC1 PE=3 SV=1;;	PF03650.13	MPC	Mitochondrial pyruvate carriers
MTR_8g104110		aluminum activated malate transporter family protein	GO:0015743;;GO:0016021;;GO:0016020	biological_process;;cellular_component;;cellular_component;;	BP:malate transport;;CC:integral component of membrane;;CC:membrane;;	------	------	------	------	ENOG410XR8V	Q:Secondary metabolites biosynthesis, transport and catabolism	XP_003630841.1	aluminum-activated malate transporter 9 isoform X1 [Medicago truncatula]	sp|Q9LS46|ALMT9_ARATH;;	Aluminum-activated malate transporter 9 OS=Arabidopsis thaliana OX=3702 GN=ALMT9 PE=2 SV=1;;	PF11744.8;;PF13515.6;;PF04632.12	ALMT;;FUSC_2;;FUSC	Aluminium activated malate transporter;;Fusaric acid resistance protein-like;;Fusaric acid resistance protein family
MTR_2g022980		MATE efflux family protein	GO:0006855;;GO:0055085;;GO:0042908;;GO:0016021;;GO:0016020;;GO:0015297;;GO:0015238;;GO:0042910	biological_process;;biological_process;;biological_process;;cellular_component;;cellular_component;;molecular_function;;molecular_function;;molecular_function;;	BP:drug transmembrane transport;;BP:transmembrane transport;;BP:xenobiotic transport;;CC:integral component of membrane;;CC:membrane;;MF:antiporter activity;;MF:drug transmembrane transporter activity;;MF:xenobiotic transporter activity;;	K03327	TC.MATE, SLC47A, norM, mdtK, dinF	------	------	COG0534	S:Function unknown	XP_013462805.1	protein DETOXIFICATION 40 [Medicago truncatula]	sp|Q9LVD9|DTX40_ARATH;;	Protein DETOXIFICATION 40 OS=Arabidopsis thaliana OX=3702 GN=DTX40 PE=1 SV=1;;	PF01554.18	MatE	MatE
MTR_7g096870		high affinity inorganic phosphate transporter	GO:0006817;;GO:0055085;;GO:0016021;;GO:0016020;;GO:0016787;;GO:0005315;;GO:0022857	biological_process;;biological_process;;cellular_component;;cellular_component;;molecular_function;;molecular_function;;molecular_function;;	BP:phosphate ion transport;;BP:transmembrane transport;;CC:integral component of membrane;;CC:membrane;;MF:hydrolase activity;;MF:inorganic phosphate transmembrane transporter activity;;MF:transmembrane transporter activity;;	K08176	PHO84	------	------	ENOG410ZVN7	S:Function unknown	XP_013449892.1	inorganic phosphate transporter 1-4 [Medicago truncatula]	sp|Q96303|PHT14_ARATH;;	Inorganic phosphate transporter 1-4 OS=Arabidopsis thaliana OX=3702 GN=PHT1-4 PE=1 SV=1;;	PF00083.24;;PF07690.16	Sugar_tr;;MFS_1	Sugar;;Major Facilitator Superfamily
MTR_4g094340		auxin-induced 5NG4-like protein	GO:0055085;;GO:0016020;;GO:0016021;;GO:0022857	biological_process;;cellular_component;;cellular_component;;molecular_function;;	BP:transmembrane transport;;CC:membrane;;CC:integral component of membrane;;MF:transmembrane transporter activity;;	------	------	------	------	ENOG410YFQG	S:Function unknown	XP_013457235.1	WAT1-related protein At1g68170 isoform X1 [Medicago truncatula]	sp|Q4PT23|WTR6_ARATH;;	WAT1-related protein At1g25270 OS=Arabidopsis thaliana OX=3702 GN=At1g25270 PE=2 SV=1;;	PF00892.20	EamA	EamA-like transporter family
MTR_7g079900		photosystem I reaction center subunit XI	GO:0030003;;GO:0070838;;GO:0009657;;GO:0015979;;GO:0055114;;GO:0009535;;GO:0009941;;GO:0009522;;GO:0016021;;GO:0016020;;GO:0010287;;GO:0009538;;GO:0016491	biological_process;;biological_process;;biological_process;;biological_process;;biological_process;;cellular_component;;cellular_component;;cellular_component;;cellular_component;;cellular_component;;cellular_component;;cellular_component;;molecular_function;;	BP:cellular cation homeostasis;;BP:divalent metal ion transport;;BP:plastid organization;;BP:photosynthesis;;BP:oxidation-reduction process;;CC:chloroplast thylakoid membrane;;CC:chloroplast envelope;;CC:photosystem I;;CC:integral component of membrane;;CC:membrane;;CC:plastoglobule;;CC:photosystem I reaction center;;MF:oxidoreductase activity;;	K02699	psaL	map00195	Photosynthesis	ENOG4111KFU	C:Energy production and conversion	XP_003624162.1	photosystem I reaction center subunit XI, chloroplastic [Medicago truncatula]	sp|Q9SUI4|PSAL_ARATH;;	Photosystem I reaction center subunit XI, chloroplastic OS=Arabidopsis thaliana OX=3702 GN=PSAL PE=1 SV=2;;	PF02605.15	PsaL	Photosystem I reaction centre subunit XI
MTR_5g030580		sphingolipid transporter spinster-like protein, putative	GO:0055085;;GO:0016021;;GO:0016020	biological_process;;cellular_component;;cellular_component;;	BP:transmembrane transport;;CC:integral component of membrane;;CC:membrane;;	------	------	------	------	COG0477	S:Function unknown	XP_003612923.1	probable sphingolipid transporter spinster homolog 2 isoform X1 [Medicago truncatula]	sp|Q9FLG8|SPNS2_ARATH;;	Probable sphingolipid transporter spinster homolog 2 OS=Arabidopsis thaliana OX=3702 GN=At5g64500 PE=2 SV=1;;	PF07690.16;;PF03137.20;;PF06779.14	MFS_1;;OATP;;MFS_4	Major Facilitator Superfamily;;Organic Anion Transporter Polypeptide;;Uncharacterised MFS-type transporter YbfB
MTR_5g083530		prephenate dehydrogenase	GO:0006571;;GO:0055114;;GO:0016021;;GO:0033730;;GO:0015299;;GO:0008977;;GO:0004665;;GO:0016491	biological_process;;biological_process;;cellular_component;;molecular_function;;molecular_function;;molecular_function;;molecular_function;;molecular_function;;	BP:tyrosine biosynthetic process;;BP:oxidation-reduction process;;CC:integral component of membrane;;MF:arogenate dehydrogenas;;MF:solut;;MF:prephenate dehydrogenase activity;;MF:prephenate dehydrogenas;;MF:oxidoreductase activity;;	K15227	TYRAAT	map00400	Phenylalanine, tyrosine and tryptophan biosynthesis	COG0287	E:Amino acid transport and metabolism	XP_003616719.1	arogenate dehydrogenase 1, chloroplastic [Medicago truncatula]	sp|Q944B6|TYRA1_ARATH;;	Arogenate dehydrogenase 1, chloroplastic OS=Arabidopsis thaliana OX=3702 GN=TYRAAT1 PE=1 SV=1;;	PF02153.17;;PF03807.17;;PF03446.15	PDH;;F420_oxidored;;NAD_binding_2	Prephenate dehydrogenase;;NADP oxidoreductase coenzyme F420-dependent;;NAD binding domain of 6-phosphogluconate dehydrogenase
MTR_4g063090		tonoplast intrinsic protein	GO:0055085;;GO:0016020;;GO:0016021;;GO:0015250;;GO:0015267	biological_process;;cellular_component;;cellular_component;;molecular_function;;molecular_function;;	BP:transmembrane transport;;CC:membrane;;CC:integral component of membrane;;MF:water channel activity;;MF:channel activity;;	K09873	TIP	------	------	COG0580	S:Function unknown	XP_003606614.1	aquaporin TIP1-1 [Medicago truncatula]	sp|P25818|TIP11_ARATH;;	Aquaporin TIP1-1 OS=Arabidopsis thaliana OX=3702 GN=TIP1-1 PE=1 SV=1;;	PF00230.20	MIP	Major intrinsic protein
MTR_0005s0200		NBS-LRR type disease resistance protein	GO:0016021;;GO:0016787;;GO:0005337;;GO:0043531	cellular_component;;molecular_function;;molecular_function;;molecular_function;;	CC:integral component of membrane;;MF:hydrolase activity;;MF:nucleoside transmembrane transporter activity;;MF:ADP binding;;	------	------	------	------	COG4886	S:Function unknown	KEH17610.1	NBS-LRR type disease resistance protein [Medicago truncatula]	sp|Q9LRR4|R13L1_ARATH;;	Putative disease resistance RPP13-like protein 1 OS=Arabidopsis thaliana OX=3702 GN=RPPL1 PE=3 SV=1;;	PF00931.22;;PF18052.1;;PF13855.6;;PF12799.7;;PF13238.6	NB-ARC;;Rx_N;;LRR_8;;LRR_4;;AAA_18	NB-ARC domain;;Rx N-terminal domain;;Leucine rich repeat;;Leucine Rich repeats;;AAA domain
MTR_5g082220	LAX1	Auxin transporter-like protein 1 [Source:UniProtKB/Swiss-Prot;Acc:Q9FEL8]	GO:0009734;;GO:0006865;;GO:0055085;;GO:0003333;;GO:0016020;;GO:0016021;;GO:0005886;;GO:0015293;;GO:0015171	biological_process;;biological_process;;biological_process;;biological_process;;cellular_component;;cellular_component;;cellular_component;;molecular_function;;molecular_function;;	BP:auxin-activated signaling pathway;;BP:amino acid transport;;BP:transmembrane transport;;BP:amino acid transmembrane transport;;CC:membrane;;CC:integral component of membrane;;CC:plasma membrane;;MF:symporter activity;;MF:amino acid transmembrane transporter activity;;	K13946	AUX1, LAX	map04075	Plant hormone signal transduction	COG0814	J:Translation, ribosomal structure and biogenesis	XP_003616599.1	auxin transporter-like protein 1 isoform X1 [Medicago truncatula]	sp|Q9FEL8|LAX1_MEDTR;;	Auxin transporter-like protein 1 OS=Medicago truncatula OX=3880 GN=LAX1 PE=2 SV=1;;	PF01490.18	Aa_trans	Transmembrane amino acid transporter protein
MTR_5g075955		transporter family ABC domain protein	GO:0070574;;GO:0055085;;GO:0016021;;GO:0016020;;GO:0015434;;GO:0042626;;GO:0099131;;GO:0099132;;GO:0016787;;GO:0000166;;GO:0016887;;GO:0005524	biological_process;;biological_process;;cellular_component;;cellular_component;;molecular_function;;molecular_function;;deleted;;deleted;;molecular_function;;molecular_function;;molecular_function;;molecular_function;;	BP:cadmium ion transmembrane transport;;BP:transmembrane transport;;CC:integral component of membrane;;CC:membrane;;MF:cadmium-transporting ATPase activity;;MF:ATPase activity, coupled to transmembrane movement of substances;;MF:old GO;;MF:old GO;;MF:hydrolase activity;;MF:nucleotide binding;;MF:ATPase activity;;MF:ATP binding;;	K05663	ABC.ATM	map02010	ABC transporters	COG5265	U:Intracellular trafficking, secretion, and vesicular transport	XP_013454183.1	ABC transporter B family member 25, mitochondrial isoform X2 [Medicago truncatula]	sp|Q9LVM1|AB25B_ARATH;;	ABC transporter B family member 25, mitochondrial OS=Arabidopsis thaliana OX=3702 GN=ABCB25 PE=1 SV=1;;	PF00664.23;;PF00005.27;;PF02463.19;;PF13401.6;;PF13191.6	ABC_membrane;;ABC_tran;;SMC_N;;AAA_22;;AAA_16	ABC transporter transmembrane region;;ABC transporter;;RecF/RecN/SMC N terminal domain;;AAA domain;;AAA ATPase domain
MTR_8g059660		hypothetical protein	GO:0016787;;GO:0004008;;GO:0008270;;GO:0003676	molecular_function;;molecular_function;;molecular_function;;molecular_function;;	MF:hydrolase activity;;MF:copper-exporting ATPase activity;;MF:zinc ion binding;;MF:nucleic acid binding;;	------	------	------	------	------	------	AET02969.1	hypothetical protein MTR_8g059660 [Medicago truncatula]	------	------	------	------	------
MTR_5g024350		glutamate receptor 3.2	GO:0035235;;GO:0006811;;GO:0016021;;GO:0016020;;GO:0005886;;GO:0004970	biological_process;;biological_process;;cellular_component;;cellular_component;;cellular_component;;molecular_function;;	BP:ionotropic glutamate receptor signaling pathway;;BP:ion transport;;CC:integral component of membrane;;CC:membrane;;CC:plasma membrane;;MF:ionotropic glutamate receptor activity;;	K05387	GRIP	------	------	ENOG410XQQV	T:Signal transduction mechanisms	AES95334.1	glutamate receptor 3.2 [Medicago truncatula]	sp|Q84W41|GLR36_ARATH;;	Glutamate receptor 3.6 OS=Arabidopsis thaliana OX=3702 GN=GLR3.6 PE=2 SV=1;;	PF01094.28;;PF00060.26;;PF00497.20;;PF13458.6;;PF10613.9	ANF_receptor;;Lig_chan;;SBP_bac_3;;Peripla_BP_6;;Lig_chan-Glu_bd	Receptor family ligand binding region;;Ligand-gated ion channel;;Bacterial extracellular solute-binding proteins, family 3;;Periplasmic binding protein;;Ligated ion channel L-glutamate- and glycine-binding site
MTR_6g092210		grave disease carrier protein	GO:0055085;;GO:0005743;;GO:0016020;;GO:0016021;;GO:0022857	biological_process;;cellular_component;;cellular_component;;cellular_component;;molecular_function;;	BP:transmembrane transport;;CC:mitochondrial inner membrane;;CC:membrane;;CC:integral component of membrane;;MF:transmembrane transporter activity;;	K15084	SLC25A16, GDA, LEU5	------	------	ENOG410ZRF1	S:Function unknown	AES77129.1	grave disease carrier protein [Medicago truncatula]	sp|F4JU70|COAC2_ARATH;;	Mitochondrial carrier protein CoAc2 OS=Arabidopsis thaliana OX=3702 GN=COAC2 PE=2 SV=1;;	PF00153.27	Mito_carr	Mitochondrial carrier protein
MTR_1g018320		sigma factor sigb regulation rsbq-like protein	GO:1902348;;GO:0009805;;GO:0015824;;GO:1901601;;GO:0010223;;GO:0016787	biological_process;;biological_process;;biological_process;;biological_process;;biological_process;;molecular_function;;	BP:cellular response to strigolactone;;BP:coumarin biosynthetic process;;BP:proline transport;;BP:strigolactone biosynthetic process;;BP:secondary shoot formation;;MF:hydrolase activity;;	------	------	------	------	COG0596	J:Translation, ribosomal structure and biogenesis	XP_003589086.1	strigolactone esterase RMS3 [Medicago truncatula]	sp|A0A109QYD3|RMS3_PEA;;	Strigolactone esterase RMS3 OS=Pisum sativum OX=3888 GN=RMS3 PE=1 SV=1;;	PF12697.7;;PF00561.20;;PF12146.8	Abhydrolase_6;;Abhydrolase_1;;Hydrolase_4	Alpha/beta hydrolase family;;alpha/beta hydrolase fold;;Serine aminopeptidase, S33
MTR_3g081580		ZIP zinc/iron transport family protein	GO:0055085;;GO:0030001;;GO:0071577;;GO:0006811;;GO:0016021;;GO:0016020;;GO:0005385;;GO:0046873	biological_process;;biological_process;;biological_process;;biological_process;;cellular_component;;cellular_component;;molecular_function;;molecular_function;;	BP:transmembrane transport;;BP:metal ion transport;;BP:zinc II ion transmembrane transport;;BP:ion transport;;CC:integral component of membrane;;CC:membrane;;MF:zinc ion transmembrane transporter activity;;MF:metal ion transmembrane transporter activity;;	K14709	SLC39A1_2_3, ZIP1_2_3	------	------	ENOG4111GP2	P:Inorganic ion transport and metabolism	XP_013461166.1	zinc transporter 5 [Medicago truncatula]	sp|Q6L8G0|ZIP5_ORYSJ;;	Zinc transporter 5 OS=Oryza sativa subsp. japonica OX=39947 GN=ZIP5 PE=2 SV=1;;	PF02535.22	Zip	ZIP Zinc transporter
MTR_3g081630		ZIP metal ion transporter family protein	GO:0030001;;GO:0055085;;GO:0016021;;GO:0016020;;GO:0005385;;GO:0046873	biological_process;;biological_process;;cellular_component;;cellular_component;;molecular_function;;molecular_function;;	BP:metal ion transport;;BP:transmembrane transport;;CC:integral component of membrane;;CC:membrane;;MF:zinc ion transmembrane transporter activity;;MF:metal ion transmembrane transporter activity;;	K14709	SLC39A1_2_3, ZIP1_2_3	------	------	ENOG4111GP2	P:Inorganic ion transport and metabolism	KEH35204.1	ZIP metal ion transporter family protein [Medicago truncatula]	sp|Q75HB1|IRT1_ORYSJ;;	F;;	PF02535.22	Zip	ZIP Zinc transporter
MTR_8g044210		phospholipid-transporting ATPase-like protein	GO:0045332;;GO:0015914;;GO:0016021;;GO:0005886;;GO:0016020;;GO:0016787;;GO:0000287;;GO:0004012;;GO:0000166;;GO:0005524	biological_process;;biological_process;;cellular_component;;cellular_component;;cellular_component;;molecular_function;;molecular_function;;molecular_function;;molecular_function;;molecular_function;;	BP:phospholipid translocation;;BP:phospholipid transport;;CC:integral component of membrane;;CC:plasma membrane;;CC:membrane;;MF:hydrolase activity;;MF:magnesium ion binding;;MF:phospholipid-translocating ATPase activity;;MF:nucleotide binding;;MF:ATP binding;;	K14802	DRS2, ATP8A	------	------	COG0474	P:Inorganic ion transport and metabolism	XP_003628144.2	phospholipid-transporting ATPase 1 [Medicago truncatula]	sp|P98204|ALA1_ARATH;;	Phospholipid-transporting ATPase 1 OS=Arabidopsis thaliana OX=3702 GN=ALA1 PE=2 SV=1;;	PF16212.5;;PF16209.5;;PF13246.6;;PF00702.26;;PF00122.20;;PF08282.12	PhoLip_ATPase_C;;PhoLip_ATPase_N;;Cation_ATPase;;Hydrolase;;E1-E2_ATPase;;Hydrolase_3	Phospholipid-translocating P-type ATPase C-terminal;;Phospholipid-translocating ATPase N-terminal;;Cation transport ATPase;;haloacid dehalogenase-like hydrolase;;E1-E2 ATPase;;haloacid dehalogenase-like hydrolase
MTR_4g064820		sugar transporter	GO:0008643;;GO:0055085;;GO:0031969;;GO:0016021;;GO:0016020;;GO:0005887;;GO:0005351;;GO:0005215;;GO:0022857	biological_process;;biological_process;;cellular_component;;cellular_component;;cellular_component;;cellular_component;;molecular_function;;molecular_function;;molecular_function;;	BP:carbohydrate transport;;BP:transmembrane transport;;CC:chloroplast membrane;;CC:integral component of membrane;;CC:membrane;;CC:integral component of plasma membrane;;MF:suga;;MF:transporter activity;;MF:transmembrane transporter activity;;	------	------	------	------	ENOG410XNQK	G:Carbohydrate transport and metabolism	AES88921.2	sugar transporter [Medicago truncatula]	sp|Q0WWW9|XYLL3_ARATH;;	D-xylose-proton symporter-like 3, chloroplastic OS=Arabidopsis thaliana OX=3702 GN=At5g59250 PE=1 SV=2;;	PF00083.24;;PF07690.16	Sugar_tr;;MFS_1	Sugar;;Major Facilitator Superfamily
MTR_5g045910		LRR receptor-like kinase family protein	GO:0048443;;GO:0006468;;GO:0016310;;GO:0000041;;GO:0010359;;GO:0002237;;GO:0019048;;GO:0010103;;GO:0016020;;GO:0005840;;GO:0016021;;GO:0016301;;GO:0016740;;GO:0000166;;GO:0004674;;GO:0005515;;GO:0004672;;GO:0005524	biological_process;;biological_process;;biological_process;;biological_process;;biological_process;;biological_process;;biological_process;;biological_process;;cellular_component;;cellular_component;;cellular_component;;molecular_function;;molecular_function;;molecular_function;;molecular_function;;molecular_function;;molecular_function;;molecular_function;;	BP:stamen development;;BP:protein phosphorylation;;BP:phosphorylation;;BP:transition metal ion transport;;BP:regulation of anion channel activity;;BP:response to molecule of bacterial origin;;BP:modulation by virus of host morphology or physiology;;BP:stomatal complex morphogenesis;;CC:membrane;;CC:ribosome;;CC:integral component of membrane;;MF:kinase activity;;MF:transferase activity;;MF:nucleo…	K17422	MRPL41	------	------	COG4886	Q:Secondary metabolites biosynthesis, transport and catabolism	AES97136.1	LRR receptor-like kinase family protein [Medicago truncatula]	sp|Q9LHP4|RCH2_ARATH;;	Receptor-like protein kinase 2 OS=Arabidopsis thaliana OX=3702 GN=RCH2 PE=1 SV=1;;	PF07714.17;;PF00069.25;;PF13855.6;;PF12799.7;;PF09809.9;;PF08263.12	Pkinase_Tyr;;Pkinase;;LRR_8;;LRR_4;;MRP-L27;;LRRNT_2	Protein tyrosine kinase;;Protein kinase domain;;Leucine rich repeat;;Leucine Rich repeats;;Mitochondrial ribosomal protein L27;;Leucine rich repeat N-terminal domain
MTR_5g099290		ClC chloride channel family protein	GO:1902476;;GO:0055085;;GO:0006821;;GO:0006811;;GO:0009535;;GO:0016021;;GO:0016020;;GO:0030554;;GO:0005247	biological_process;;biological_process;;biological_process;;biological_process;;cellular_component;;cellular_component;;cellular_component;;molecular_function;;molecular_function;;	BP:chloride transmembrane transport;;BP:transmembrane transport;;BP:chloride transport;;BP:ion transport;;CC:chloroplast thylakoid membrane;;CC:integral component of membrane;;CC:membrane;;MF:adenyl nucleotide binding;;MF:voltage-gated chloride channel activity;;	------	------	------	------	COG0038	P:Inorganic ion transport and metabolism	KEH28502.1	ClC chloride channel family protein [Medicago truncatula]	sp|Q8GX93|CLCE_ARATH;;	Chloride channel protein CLC-e OS=Arabidopsis thaliana OX=3702 GN=CLC-E PE=2 SV=2;;	PF00654.20;;PF00571.28	Voltage_CLC;;CBS	Voltage gated chloride channel;;CBS domain
MTR_4g012850		carnitine/acylcarnitine carrier CACL-like protein	GO:0006844;;GO:0055085;;GO:0016020;;GO:0016021;;GO:0022857	biological_process;;biological_process;;cellular_component;;cellular_component;;molecular_function;;	BP:acyl carnitine transport;;BP:transmembrane transport;;CC:membrane;;CC:integral component of membrane;;MF:transmembrane transporter activity;;	K15109	SLC25A20_29, CACT, CACL, CRC1	map04714	Thermogenesis	ENOG410Z9ZS	S:Function unknown	XP_003604475.1	mitochondrial arginine transporter BAC2 [Medicago truncatula]	sp|Q9CA93|BAC2_ARATH;;	Mitochondrial arginine transporter BAC2 OS=Arabidopsis thaliana OX=3702 GN=BAC2 PE=1 SV=1;;	PF00153.27	Mito_carr	Mitochondrial carrier protein
MTR_3g073670		heavy metal transport/detoxification superfamily protein	GO:0030001;;GO:0046872	biological_process;;molecular_function;;	BP:metal ion transport;;MF:metal ion binding;;	------	------	------	------	COG2608	S:Function unknown	XP_013460832.1	heavy metal-associated isoprenylated plant protein 24 [Medicago truncatula]	sp|O81464|HIP24_ARATH;;	Heavy metal-associated isoprenylated plant protein 24 OS=Arabidopsis thaliana OX=3702 GN=HIPP24 PE=1 SV=1;;	PF00403.26	HMA	Heavy-metal-associated domain
MTR_6g015745		disease resistance protein (TIR-NBS-LRR class)	GO:0030001;;GO:0007165;;GO:0043531;;GO:0005515;;GO:0003677;;GO:0046872	biological_process;;biological_process;;molecular_function;;molecular_function;;molecular_function;;molecular_function;;	BP:metal ion transport;;BP:signal transduction;;MF:ADP binding;;MF:protein binding;;MF:DNA binding;;MF:metal ion binding;;	------	------	------	------	ENOG4112BMQ;;ENOG4111VMD	S:Function unknown;;	XP_013451076.1	TMV resistance protein N [Medicago truncatula]	sp|Q40392|TMVRN_NICGU;;	TMV resistance protein N OS=Nicotiana glutinosa OX=35889 GN=N PE=1 SV=1;;	PF01582.20;;PF00931.22;;PF13676.6	TIR;;NB-ARC;;TIR_2	TIR domain;;NB-ARC domain;;TIR domain
MTR_4g132570		ERD (early-responsive to dehydration stress) family protein	GO:0016021;;GO:0016020;;GO:0005886;;GO:0005227	cellular_component;;cellular_component;;cellular_component;;molecular_function;;	CC:integral component of membrane;;CC:membrane;;CC:plasma membrane;;MF:calcium activated cation channel activity;;	------	------	------	------	COG5594	S:Function unknown	XP_003610472.1	calcium permeable stress-gated cation channel 1 [Medicago truncatula]	sp|Q5XEZ5|CSC1_ARATH;;	Calcium permeable stress-gated cation channel 1 OS=Arabidopsis thaliana OX=3702 GN=CSC1 PE=1 SV=1;;	PF02714.15;;PF13967.6;;PF14703.6	RSN1_7TM;;RSN1_TM;;PHM7_cyt	Calcium-dependent channel, 7TM region, putative phosphate;;Late exocytosis, associated with Golgi transport;;Cytosolic domain of 10TM putative phosphate transporter
MTR_1g022315		sugar porter (SP) family MFS transporter	GO:0008643;;GO:0055085;;GO:0016021;;GO:0016020;;GO:0005887;;GO:0005351;;GO:0005215;;GO:0022857	biological_process;;biological_process;;cellular_component;;cellular_component;;cellular_component;;molecular_function;;molecular_function;;molecular_function;;	BP:carbohydrate transport;;BP:transmembrane transport;;CC:integral component of membrane;;CC:membrane;;CC:integral component of plasma membrane;;MF:suga;;MF:transporter activity;;MF:transmembrane transporter activity;;	K08145	SLC2A8, GLUT8	------	------	ENOG410XNQK	D:Cell cycle control, cell division, chromosome partitioning	XP_013466113.1	sugar transporter ERD6-like 6 [Medicago truncatula]	sp|Q9FRL3|ERDL6_ARATH;;	Sugar transporter ERD6-like 6 OS=Arabidopsis thaliana OX=3702 GN=At1g75220 PE=1 SV=1;;	PF00083.24;;PF07690.16	Sugar_tr;;MFS_1	Sugar;;Major Facilitator Superfamily
MTR_6g027660		cationic amino acid transporter 2, vacuolar protein	GO:0055085;;GO:0016020;;GO:0016021;;GO:0022857	biological_process;;cellular_component;;cellular_component;;molecular_function;;	BP:transmembrane transport;;CC:membrane;;CC:integral component of membrane;;MF:transmembrane transporter activity;;	K13863	SLC7A1, ATRC1	------	------	COG0531	E:Amino acid transport and metabolism	XP_013451533.1	cationic amino acid transporter 2, vacuolar [Medicago truncatula]	sp|Q9ASS7|CAAT2_ARATH;;	Cationic amino acid transporter 2, vacuolar OS=Arabidopsis thaliana OX=3702 GN=CAT2 PE=1 SV=1;;	PF13520.6;;PF00324.21;;PF13906.6	AA_permease_2;;AA_permease;;AA_permease_C	Amino acid permease;;Amino acid permease;;C-terminus of AA_permease
MTR_7g114070		stress regulated protein	GO:0070838;;GO:0030003;;GO:0006508;;GO:0016021;;GO:0016020;;GO:0009507;;GO:0004222;;GO:0005524	biological_process;;biological_process;;biological_process;;cellular_component;;cellular_component;;cellular_component;;molecular_function;;molecular_function;;	BP:divalent metal ion transport;;BP:cellular cation homeostasis;;BP:proteolysis;;CC:integral component of membrane;;CC:membrane;;CC:chloroplast;;MF:metalloendopeptidase activity;;MF:ATP binding;;	------	------	------	------	ENOG410YFKF	S:Function unknown	XP_003626343.2	uncharacterized protein LOC11431321 [Medicago truncatula]	------	------	------	------	------
MTR_5g094830		multidrug resistance protein ABC transporter family protein	GO:0055085;;GO:0016021;;GO:0016020;;GO:0000325;;GO:0005774;;GO:0016787;;GO:0042626;;GO:0099131;;GO:0008559;;GO:0016887;;GO:0000166;;GO:0005524	biological_process;;cellular_component;;cellular_component;;cellular_component;;cellular_component;;molecular_function;;molecular_function;;deleted;;molecular_function;;molecular_function;;molecular_function;;molecular_function;;	BP:transmembrane transport;;CC:integral component of membrane;;CC:membrane;;CC:plant-type vacuole;;CC:vacuolar membrane;;MF:hydrolase activity;;MF:ATPase activity, coupled to transmembrane movement of substances;;MF:old GO;;MF:xenobiotic-transporting ATPase activity;;MF:ATPase activity;;MF:nucleotide binding;;MF:ATP binding;;	K05666	ABCC2	map02010	ABC transporters	COG1132	V:Defense mechanisms	XP_003617730.2	ABC transporter C family member 3 isoform X1 [Medicago truncatula]	sp|Q9LK64|AB3C_ARATH;;	ABC transporter C family member 3 OS=Arabidopsis thaliana OX=3702 GN=ABCC3 PE=1 SV=1;;	PF00005.27;;PF00664.23;;PF13555.6;;PF13304.6;;PF01935.17	ABC_tran;;ABC_membrane;;AAA_29;;AAA_21;;DUF87	ABC transporter;;ABC transporter transmembrane region;;P-loop containing region of AAA domain;;AAA domain, putative AbiEii toxin, Type IV TA system;;Helicase HerA, central domain
MTR_3g069280		phosphatidylinositol-specific phospholipase C	GO:0006629;;GO:0051209;;GO:0007165;;GO:0032959;;GO:0035556;;GO:0016042;;GO:0048015;;GO:0005622;;GO:0005886;;GO:0016787;;GO:0004435;;GO:0008081	biological_process;;biological_process;;biological_process;;biological_process;;biological_process;;biological_process;;biological_process;;cellular_component;;cellular_component;;molecular_function;;molecular_function;;molecular_function;;	BP:lipid metabolic process;;BP:release of sequestered calcium ion into cytosol;;BP:signal transduction;;BP:inositol trisphosphate biosynthetic process;;BP:intracellular signal transduction;;BP:lipid catabolic process;;BP:phosphatidylinositol-mediated signaling;;CC:intracellular;;CC:plasma membrane;;MF:hydrolase activity;;MF:phosphatidylinositol phospholipase C activity;;MF:phosphoric diester hydr…	K05857	PLCD	map04070;;map04933;;map00562	Phosphatidylinositol signaling system;;AGE-RAGE signaling pathway in diabetic complications;;Inositol phosphate metabolism	ENOG410XPSW	S:Function unknown	XP_003600780.1	phosphoinositide phospholipase C 2 [Medicago truncatula]	sp|Q39033|PLCD2_ARATH;;	Phosphoinositide phospholipase C 2 OS=Arabidopsis thaliana OX=3702 GN=PLC2 PE=1 SV=1;;	PF00388.19;;PF00387.19;;PF00168.30;;PF09279.11	PI-PLC-X;;PI-PLC-Y;;C2;;EF-hand_like	Phosphatidylinositol-specific phospholipase C, X domain;;Phosphatidylinositol-specific phospholipase C, Y domain;;C2 domain;;Phosphoinositide-specific phospholipase C, efhand-like
MTR_5g061880		high affinity sulfate transporter	GO:1902358;;GO:0008272;;GO:0055085;;GO:0016020;;GO:0016021;;GO:0005887;;GO:0005886;;GO:0015301;;GO:0015116;;GO:0008271	biological_process;;biological_process;;biological_process;;cellular_component;;cellular_component;;cellular_component;;cellular_component;;molecular_function;;molecular_function;;molecular_function;;	BP:sulfate transmembrane transport;;BP:sulfate transport;;BP:transmembrane transport;;CC:membrane;;CC:integral component of membrane;;CC:integral component of plasma membrane;;CC:plasma membrane;;MF:anio;;MF:sulfate transmembrane transporter activity;;MF:secondary active sulfate transmembrane transporter activity;;	K17470	SULTR1	------	------	COG0659	P:Inorganic ion transport and metabolism	XP_003614968.1	sulfate transporter 1.3 [Medicago truncatula]	sp|Q9FEP7|SUT13_ARATH;;	Sulfate transporter 1.3 OS=Arabidopsis thaliana OX=3702 GN=SULTR1;3 PE=2 SV=1;;	PF00916.20;;PF01740.21	Sulfate_transp;;STAS	Sulfate permease family;;STAS domain
MTR_2g078350		calcium-binding EF-hand protein	GO:0055085;;GO:0016021;;GO:0016020;;GO:0005509	biological_process;;cellular_component;;cellular_component;;molecular_function;;	BP:transmembrane transport;;CC:integral component of membrane;;CC:membrane;;MF:calcium ion binding;;	------	------	------	------	ENOG4111577	S:Function unknown	KEH38650.1	calcium-binding EF-hand protein [Medicago truncatula]	sp|Q5QNI2|NCL1_ORYSJ;;	Sodium/calcium exchanger NCL1 OS=Oryza sativa subsp. japonica OX=39947 GN=NCL1 PE=2 SV=1;;	PF13499.6;;PF00036.32;;PF13405.6;;PF01699.24;;PF13833.6;;PF10591.9	EF-hand_7;;EF-hand_1;;EF-hand_6;;Na_Ca_ex;;EF-hand_8;;SPARC_Ca_bdg	EF-hand domain pair;;EF hand;;EF-hand domain;;Sodium/calcium exchanger protein;;EF-hand domain pair;;Secreted protein acidic and rich in cysteine Ca binding region
MTR_4g114320		substrate carrier family protein	GO:0055085;;GO:0016020;;GO:0016021;;GO:0022857	biological_process;;cellular_component;;cellular_component;;molecular_function;;	BP:transmembrane transport;;CC:membrane;;CC:integral component of membrane;;MF:transmembrane transporter activity;;	K14684	SLC25A23S	------	------	ENOG410ZRF1	L:Replication, recombination and repair	XP_003609311.1	adenine nucleotide transporter BT1, chloroplastic/mitochondrial [Medicago truncatula]	sp|Q9SUV1|BRT1_ARATH;;	Adenine nucleotide transporter BT1, chloroplastic/mitochondrial OS=Arabidopsis thaliana OX=3702 GN=BT1 PE=1 SV=1;;	PF00153.27	Mito_carr	Mitochondrial carrier protein
MTR_1g064540		vacuolar (H+)-ATPase G subunit	GO:1902600;;GO:0006811;;GO:0016471;;GO:0016787;;GO:0042626;;GO:0099131;;GO:0008553	biological_process;;biological_process;;cellular_component;;molecular_function;;molecular_function;;deleted;;molecular_function;;	BP:hydrogen ion transmembrane transport;;BP:ion transport;;CC:vacuolar proton-transporting V-type ATPase complex;;MF:hydrolase activity;;MF:ATPase activity, coupled to transmembrane movement of substances;;MF:old GO;;MF:hydrogen-exporting ATPase activity, phosphorylative mechanism;;	K02152	ATPeV1G, ATP6G	map04145;;map05165;;map00190	Phagosome;;Human papillomavirus infection;;Oxidative phosphorylation	ENOG4111XX0	C:Energy production and conversion	XP_013468202.1	V-type proton ATPase subunit G [Medicago truncatula]	sp|Q9SP55|VATG_CITLI;;	V-type proton ATPase subunit G OS=Citrus limon OX=2708 GN=VATG PE=3 SV=1;;	PF03179.15	V-ATPase_G	Vacuolar
MTR_6g069510		auxin efflux carrier family transporter	GO:0055085;;GO:0009734;;GO:0016021;;GO:0016020	biological_process;;biological_process;;cellular_component;;cellular_component;;	BP:transmembrane transport;;BP:auxin-activated signaling pathway;;CC:integral component of membrane;;CC:membrane;;	K13947	PIN	------	------	ENOG410Y9XE	S:Function unknown	XP_003619829.1	probable auxin efflux carrier component 1c [Medicago truncatula]	sp|Q5SMQ9|PIN1A_ORYSJ;;	Auxin efflux carrier component 1a OS=Oryza sativa subsp. japonica OX=39947 GN=PIN1A PE=2 SV=1;;	PF03547.18	Mem_trans	Membrane transport protein
MTR_8g101890		ATP synthase G subunit family protein	GO:0099132;;GO:0015986;;GO:0000276;;GO:0015078	deleted;;biological_process;;cellular_component;;molecular_function;;	old GO;;BP:ATP synthesis coupled proton transport;;CC:mitochondrial proton-transporting ATP synthase complex, coupling factor;;MF:hydrogen ion transmembrane transporter activity;;	K02140	ATPeFG, ATP5L, ATP20	map00190;;map04714	Oxidative phosphorylation;;Thermogenesis	ENOG4111XRX	I:Lipid transport and metabolism	XP_013447294.1	uncharacterized protein LOC25502259 [Medicago truncatula]	------	------	PF04718.15	ATP-synt_G	Mitochondrial ATP synthase g subunit
MTR_1g094620		transmembrane amino acid transporter family protein	GO:0003333;;GO:0016021;;GO:0016020;;GO:0005774;;GO:0015171	biological_process;;cellular_component;;cellular_component;;cellular_component;;molecular_function;;	BP:amino acid transmembrane transport;;CC:integral component of membrane;;CC:membrane;;CC:vacuolar membrane;;MF:amino acid transmembrane transporter activity;;	K15015	SLC32A, VGAT	------	------	COG0814	E:Amino acid transport and metabolism	AES62112.2	transmembrane amino acid transporter family protein [Medicago truncatula]	sp|F4IUW3|AVT1C_ARATH;;	Amino acid transporter AVT1C OS=Arabidopsis thaliana OX=3702 GN=AVT1C PE=1 SV=1;;	PF01490.18	Aa_trans	Transmembrane amino acid transporter protein
MTR_0082s0100		hypothetical protein	GO:1902600;;GO:0046034;;GO:0005739	biological_process;;biological_process;;cellular_component;;	BP:hydrogen ion transmembrane transport;;BP:ATP metabolic process;;CC:mitochondrion;;	------	------	------	------	------	------	KEH16851.1	hypothetical protein MTR_0082s0100 [Medicago truncatula]	sp|P92540|M1060_ARATH;;	Uncharacterized mitochondrial protein AtMg01060 OS=Arabidopsis thaliana OX=3702 GN=AtMg01060 PE=4 SV=1;;	------	------	------
MTR_7g069070		electron transport SCO1/SenC family protein, putative	GO:0033617;;GO:0006878;;GO:0008535;;GO:0009793;;GO:0006825;;GO:0045454;;GO:0016021;;GO:0016020;;GO:0005623;;GO:0005743;;GO:0005739;;GO:0046872;;GO:0005507	biological_process;;biological_process;;biological_process;;biological_process;;biological_process;;biological_process;;cellular_component;;cellular_component;;cellular_component;;cellular_component;;cellular_component;;molecular_function;;molecular_function;;	BP:mitochondrial respiratory chain complex IV assembly;;BP:cellular copper ion homeostasis;;BP:respiratory chain complex IV assembly;;BP:embryo development ending in seed dormancy;;BP:copper ion transport;;BP:cell redox homeostasis;;CC:integral component of membrane;;CC:membrane;;CC:cell;;CC:mitochondrial inner membrane;;CC:mitochondrion;;MF:metal ion binding;;MF:copper ion binding;;	K07152	SCO1_2	------	------	COG1999	S:Function unknown	XP_013449172.1	protein SCO1 homolog 1, mitochondrial [Medicago truncatula]	sp|Q8VYP0|SCO11_ARATH;;	Protein SCO1 homolog 1, mitochondrial OS=Arabidopsis thaliana OX=3702 GN=HCC1 PE=2 SV=1;;	PF02630.14;;PF00578.21;;PF13905.6	SCO1-SenC;;AhpC-TSA;;Thioredoxin_8	SCO1/SenC;;AhpC/TSA family;;Thioredoxin-like
MTR_1g092670		copper chaperone	GO:0030001;;GO:0046872	biological_process;;molecular_function;;	BP:metal ion transport;;MF:metal ion binding;;	K07213	ATOX1, ATX1, copZ, golB	------	------	COG2608	K:Transcription	XP_003591755.1	copper transport protein ATX1 [Medicago truncatula]	sp|Q94BT9|ATOX1_ARATH;;	Copper transport protein ATX1 OS=Arabidopsis thaliana OX=3702 GN=ATX1 PE=1 SV=2;;	PF00403.26	HMA	Heavy-metal-associated domain
MTR_8g030600		anion transporter 4	GO:0055085;;GO:0016020;;GO:0016021;;GO:0009536;;GO:0005315	biological_process;;cellular_component;;cellular_component;;cellular_component;;molecular_function;;	BP:transmembrane transport;;CC:membrane;;CC:integral component of membrane;;CC:plastid;;MF:inorganic phosphate transmembrane transporter activity;;	K08193	SLC17A	------	------	ENOG410XPWC	G:Carbohydrate transport and metabolism	XP_003627567.1	ascorbate transporter, chloroplastic [Medicago truncatula]	sp|Q8GX78|ANTR2_ARATH;;	Ascorbate transporter, chloroplastic OS=Arabidopsis thaliana OX=3702 GN=PHT4;4 PE=1 SV=1;;	PF07690.16	MFS_1	Major Facilitator Superfamily
MTR_6g032895		cytochrome C oxidase subunit 3	GO:1902600;;GO:0006123;;GO:0019646;;GO:0009060;;GO:0022904;;GO:0016021;;GO:0016020;;GO:0005739;;GO:0005743;;GO:0004129;;GO:0015453;;GO:0015002;;GO:0009055	biological_process;;biological_process;;biological_process;;biological_process;;biological_process;;cellular_component;;cellular_component;;cellular_component;;cellular_component;;molecular_function;;molecular_function;;molecular_function;;molecular_function;;	BP:hydrogen ion transmembrane transport;;BP:mitochondrial electron transport, cytochrome c to oxygen;;BP:aerobic electron transport chain;;BP:aerobic respiration;;BP:respiratory electron transport chain;;CC:integral component of membrane;;CC:membrane;;CC:mitochondrion;;CC:mitochondrial inner membrane;;MF:cytochrome-c oxidase activity;;MF:oxidoreduction-driven active transmembrane transporter acti…	K02262	COX3	map00190;;map04714	Oxidative phosphorylation;;Thermogenesis	COG1845	C:Energy production and conversion	KEH25606.1	cytochrome C oxidase subunit 3 [Medicago truncatula]	sp|Q03227|COX3_VICFA;;	Cytochrome c oxidase subunit 3 OS=Vicia faba OX=3906 GN=COX3 PE=3 SV=1;;	PF00510.18	COX3	Cytochrome c oxidase subunit III

## Sheet: ion transport 
legends	Description
Number	The number of genes/transcripts enriched to the GO term.
GO ID	The number corresponding to the GO Term.
Term Type	The three major classifications of GO (i.e. BP, CC, MF).
Description	Description of the GO function
Ratio_in_study	The proportion of the GO in the target gene set, the numerator is the number of genes/transcripts enriched to the GO in the gene set, and the denominator is the total number of genes/transcripts with GO annotations in the gene set.
Ratio_in_pop	The proportion of this GO in the background genes/transcripts (all genes/transcripts obtained by sequencing), the numerator is the number of all background genes/transcripts enriched with this GO, and the denominator is the total number of all background genes/transcripts with GO annotations.
Pvalue	Uncorrected p-value, the p-value represents whether the enriched result is statistically significant, the smaller the p-value, the more statistically significant it is.
Padjust	Corrected Pvalue value.
Number	GO ID	Term Type	Description	Ratio_in_study	Ratio_in_pop	Pvalue	Padjust
61	GO:0034220	BP	ion transmembrane transport	61/1946	698/44558	2.15641e-06	0.000693675
124	GO:0055085	BP	transmembrane transport	124/1946	1608/44558	2.73097e-06	0.000693675
79	GO:0015075	MF	ion transmembrane transporter activity	79/1946	1039/44558	4.78042e-06	0.000698103
78	GO:0015318	MF	inorganic molecular entity transmembrane transporter activity	78/1946	1004/44558	4.78284e-06	0.000698103
124	GO:0022857	MF	transmembrane transporter activity	124/1946	1906/44558	1.22169e-05	0.000964506
37	GO:0098655	BP	cation transmembrane transport	37/1946	422/44558	6.28046e-05	0.0039942
34	GO:0098662	BP	inorganic cation transmembrane transport	34/1946	378/44558	7.21219e-05	0.00443283
37	GO:0098660	BP	inorganic ion transmembrane transport	37/1946	427/44558	0.00010574	0.00612889
27	GO:0008509	MF	anion transmembrane transporter activity	27/1946	295/44558	0.000290428	0.0142997
17	GO:0098656	BP	anion transmembrane transport	17/1946	151/44558	0.000340847	0.0160076
49	GO:0022890	MF	inorganic cation transmembrane transporter activity	49/1946	679/44558	0.00061888	0.0262394
51	GO:0008324	MF	cation transmembrane transporter activity	51/1946	727/44558	0.000937029	0.0350258
10	GO:0003333	BP	amino acid transmembrane transport	10/1946	73/44558	0.00124675	0.0449517
16	GO:0008514	MF	organic anion transmembrane transporter activity	16/1946	156/44558	0.00137748	0.0490853
61	GO:0006812	BP	cation transport	61/1946	690/44558	3.02101e-06	0.000693675
16	GO:0072511	BP	divalent inorganic cation transport	16/1946	123/44558	9.42088e-05	0.00556265
96	GO:0006811	BP	ion transport	96/1946	1136/44558	2.03969e-06	0.000693675
61	GO:0006812	BP	cation transport	61/1946	690/44558	3.02101e-06	0.000693675
15	GO:0000041	BP	transition metal ion transport	15/1946	85/44558	3.81606e-06	0.000693675
38	GO:0030001	BP	metal ion transport	38/1946	420/44558	3.11108e-05	0.0021422
16	GO:0070838	BP	divalent metal ion transport	16/1946	122/44558	8.53738e-05	0.00511015
16	GO:0072511	BP	divalent inorganic cation transport	16/1946	123/44558	9.42088e-05	0.00556265
29	GO:0006820	BP	anion transport	29/1946	323/44558	0.000286461	0.0142154
